# Supplementary material for: Cytochalasans from the Endophytic Fungus Phomopsis sp. shj2 and Their Antimigratory Activities
Source: MDPI journal article supplement (doi:10.3390/jof8050543), 2022-05-23
Supplement: s1 [file s1]

# Cytochalasans from the Endophytic Fungus *Phomopsis* sp. shj2 and Their Antimigratory Activities

Bing-Chao Yan <sup>1,2</sup>, Wei-Guang Wang <sup>1</sup>, Ling-Mei Kong <sup>1</sup>, Jian-Wei Tang, Xue Du <sup>1,2</sup>, Yan Li <sup>1</sup> and Pema-Tenzin Puno <sup>1,2,\*</sup>

<sup>1</sup> State Key Laboratory of Phytochemistry and Plant Resources in West China, Kunming Institute of Botany, Chinese Academy of Sciences, and Yunnan Key Laboratory of Natural Medicinal Chemistry, Kunming 650201, China; yanbingchao@mail.kib.ac.cn (B.-C. Y.); wwq@live.cn (W.-G. W.); konglingmei@mail.kib.ac.cn (L.-M. K.); tangjianwei@mail.kib.ac.cn (J.-W. T.); duxue@mail.kib.ac.cn (X. D.); liyan@mail.kib.ac.cn (Y. L.)

<sup>2</sup> University of Chinese Academy of Sciences, Beijing 100049, China

\* Correspondence: punopematenzin@mail.kib.ac.cn (P.-T. P.)

## **Table of Contents**

|                                                                     |           |
|---------------------------------------------------------------------|-----------|
| <b>1. NMR, HRESIMS, UV, ORD, and CD spectra of compound 1 .....</b> | <b>1</b>  |
| <b>2. NMR, HRESIMS, UV, ORD, and CD spectra of compound 2.....</b>  | <b>7</b>  |
| <b>3. NMR, HRESIMS, UV, ORD, and CD spectra of compound 3.....</b>  | <b>13</b> |
| <b>4. NMR, HRESIMS, UV, ORD, and CD spectra of compound 4.....</b>  | <b>19</b> |
| <b>5. NMR, HRESIMS, UV, ORD, and CD spectra of compound 5.....</b>  | <b>25</b> |
| <b>6. NMR, HRESIMS, UV, ORD, and CD spectra of compound 6.....</b>  | <b>31</b> |
| <b>7. NMR, HRESIMS, UV, ORD, and CD spectra of compound 7 .....</b> | <b>37</b> |

**1. NMR, HRESIMS, UV, ORD, and CD spectra of compound 1**

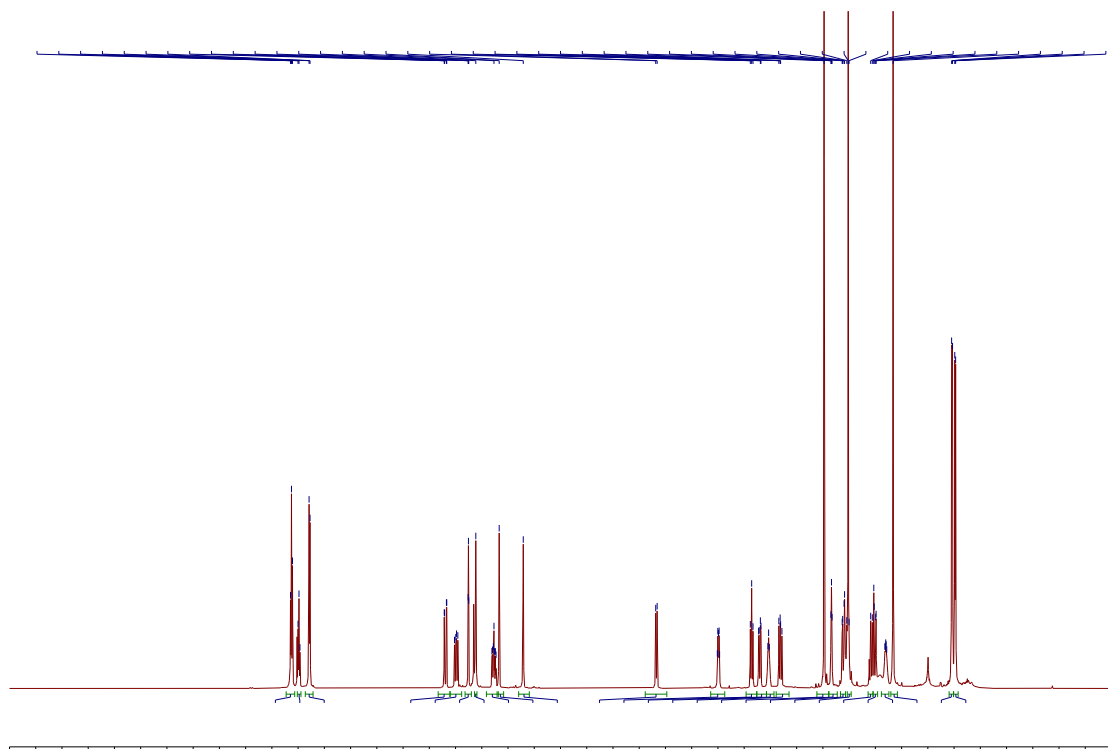

**Figure S1.**  $^1\text{H}$  NMR spectrum of **1** (800 MHz,  $\text{CDCl}_3$ ).

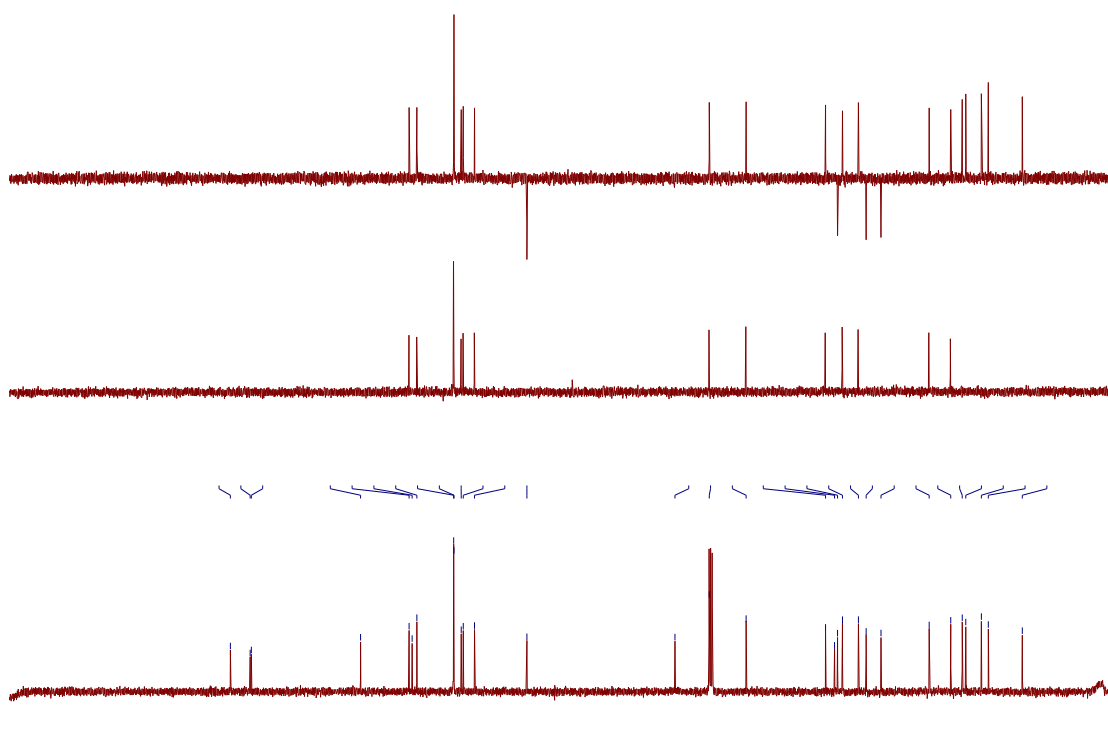

**Figure S2.**  $^{13}\text{C}$  NMR, DEPT-90 and DEPT-135 spectra of **1** (100 MHz,  $\text{CDCl}_3$ ).

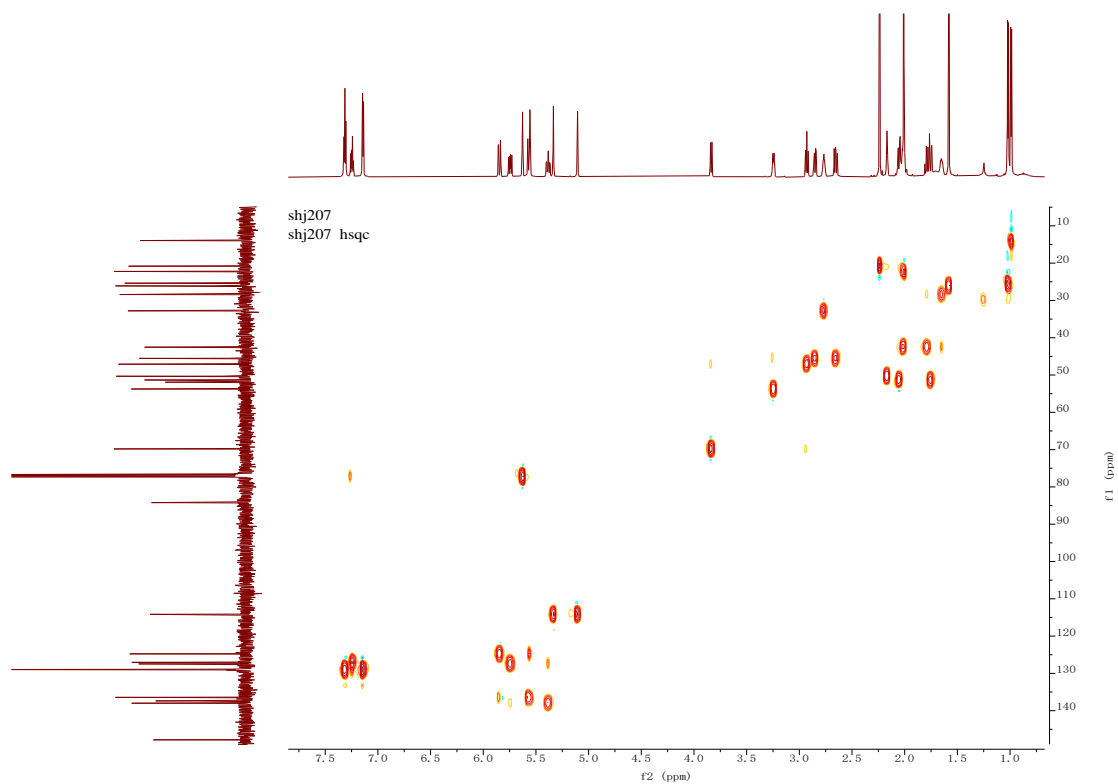

**Figure S3.** HSQC spectrum of **1** (400 MHz, CDCl<sub>3</sub>).

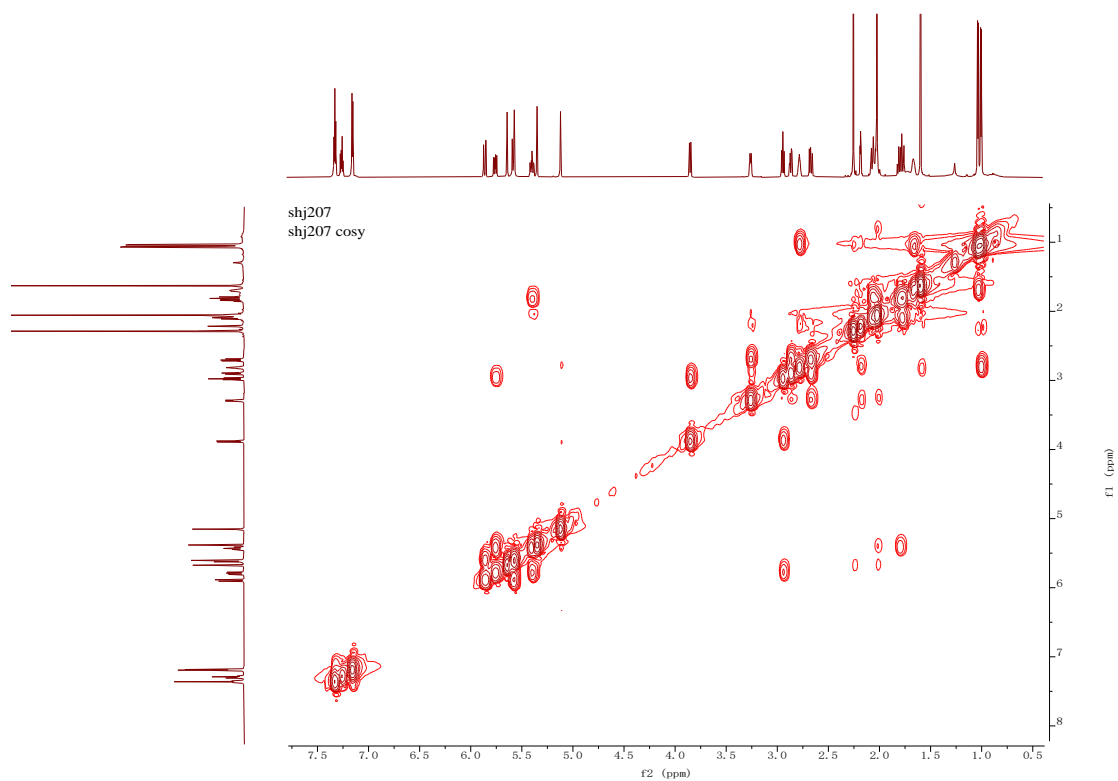

**Figure S4.** <sup>1</sup>H-<sup>1</sup>H COSY spectrum of **1** (400 MHz, CDCl<sub>3</sub>).



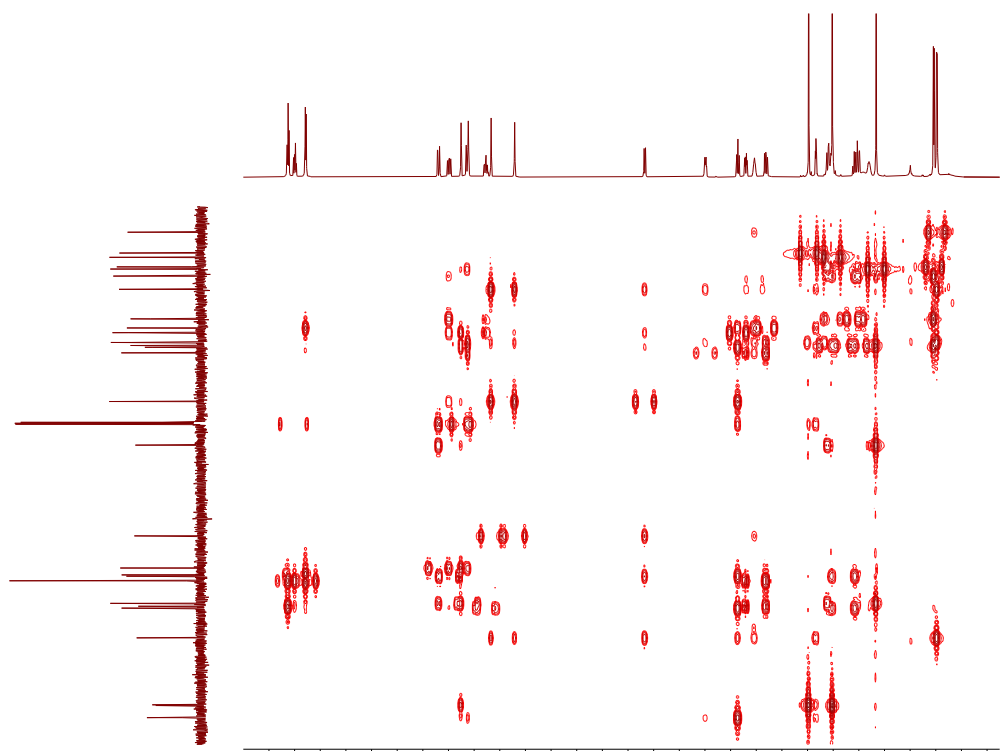

**Figure S5.** HMBC spectrum of **1** (400 MHz, CDCl<sub>3</sub>).

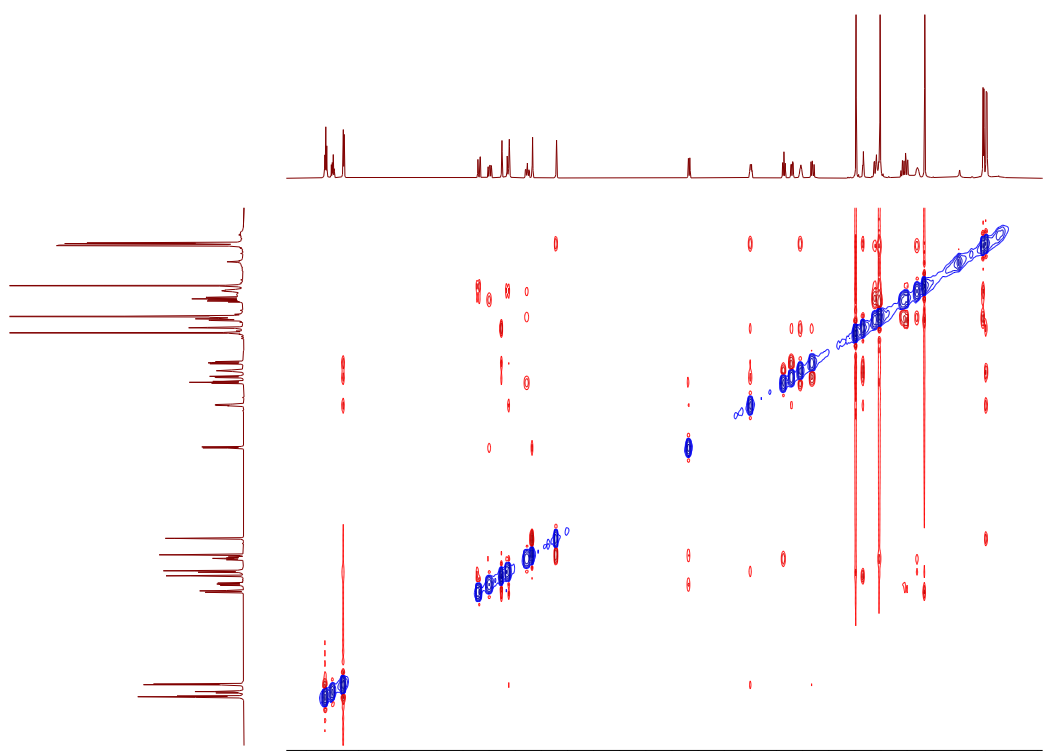

**Figure S6.** ROESY spectrum of **1** (400 MHz, CDCl<sub>3</sub>).

## Qualitative Analysis Report

|                        |              |               |                       |
|------------------------|--------------|---------------|-----------------------|
| Data Filename          | SHJ207.d     | Sample Name   | SHJ207                |
| Sample Type            | Sample       | Position      | P1-A1                 |
| Instrument Name        | Instrument 1 | User Name     |                       |
| Acq Method             | SIBU.m       | Acquired Time | 12/23/2014 9:20:46 AM |
| IRM Calibration Status | Success      | DA Method     | Default.m             |
| Comment                |              |               |                       |

|                |                             |
|----------------|-----------------------------|
| Sample Group   | Info.                       |
| Acquisition SW | 6200 series TOF/6500 series |
| Version        | Q-TOF B.05.01 (B5125.2)     |

### User Spectra

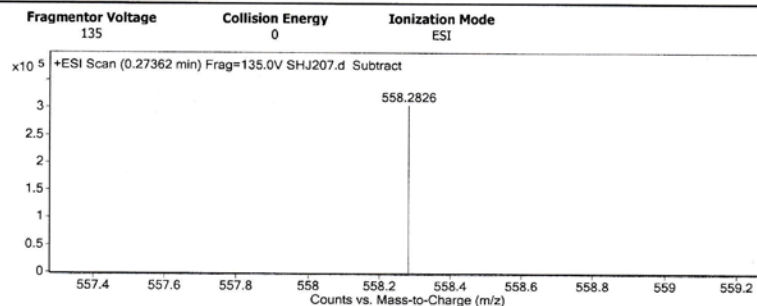

#### Peak List

| m/z       | z | Abund     | Formula      | Ion     |
|-----------|---|-----------|--------------|---------|
| 476.279   | 1 | 101074.23 |              |         |
| 477.2823  | 1 | 33766.22  |              |         |
| 536.3005  | 1 | 59321.33  |              |         |
| 537.3039  | 1 | 20107.72  |              |         |
| 558.2826  | 1 | 304737.38 | C32 H41 N O6 | (M+Na)+ |
| 559.2854  | 1 | 104583.77 | C32 H41 N O6 | (M+Na)+ |
| 560.2875  | 1 | 20597.91  | C32 H41 N O6 | (M+Na)+ |
| 574.2633  | 1 | 18297.42  |              |         |
| 1093.5742 | 1 | 41656.8   |              |         |
| 1094.5808 | 1 | 30091.71  |              |         |

#### Formula Calculator Element Limits

| Element | Min | Max |
|---------|-----|-----|
| C       | 3   | 60  |
| H       | 0   | 120 |
| O       | 0   | 10  |
| N       | 0   | 3   |

#### Formula Calculator Results

| Formula      | CalculatedMass | CalculatedMz | Mz       | Diff. (mDa) | Diff. (ppm) | DBE     |
|--------------|----------------|--------------|----------|-------------|-------------|---------|
| C32 H41 N O6 | 535.2934       | 558.2826     | 558.2826 | 0.2         | 0.4         | 13.0000 |

--- End Of Report ---

Figure S7. HRESIMS spectrum of **1**.

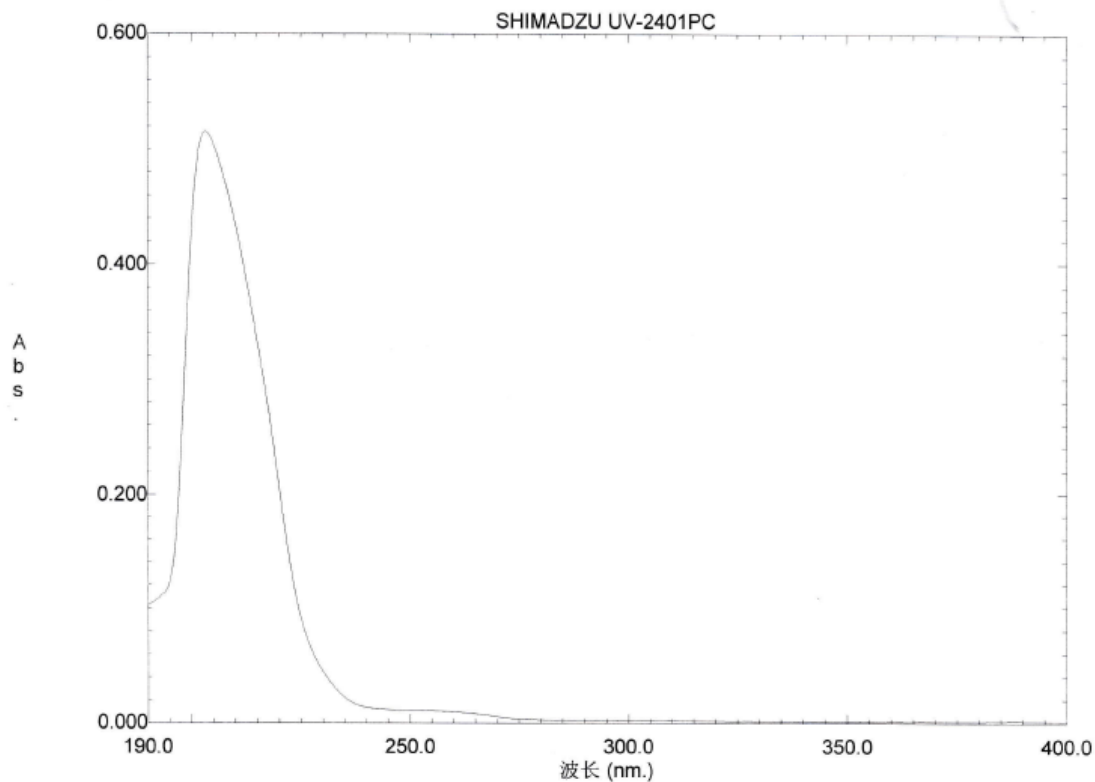

文件名: SHJ207

SHJ207

创建于: 15:12 15-01-23

样品浓度: 0.0128毫克/毫升

数据: 原始

溶剂: 甲醇

测量模式: Abs.  
扫描速度: 中速  
狭缝: 5.0  
采样间隔: 0.2

| 否. | 波长 (nm.) | Abs.   |
|----|----------|--------|
| 1  | 203.20   | 0.5151 |

**Figure S8.** UV spectrum of **1**.

Optical rotation measurement

Model : P-1020 (A060460638)

| No.  | Sample   | Mode   | Data    | Monitor Blank    | Temp. Cell Temp Point | Date Comment Sample Name                               | Light Filter Operator | Cycle Time Integ Time |
|------|----------|--------|---------|------------------|-----------------------|--------------------------------------------------------|-----------------------|-----------------------|
| No.1 | 20 (1/3) | Sp.Rot | 44.3860 | 0.0506<br>0.0000 | 19.6<br>50.00         | Thu Jan 22 18:11:51 2015<br>0.00228g/mL MeOH<br>SHJ207 | Na<br>589nm           | 2 sec<br>10 sec       |
| No.2 | 20 (2/3) | Sp.Rot | 45.2630 | 0.0516<br>0.0000 | 19.6<br>50.00         | Thu Jan 22 18:12:04 2015<br>0.00228g/mL MeOH<br>SHJ207 | Na<br>589nm           | 2 sec<br>10 sec       |
| No.3 | 20 (3/3) | Sp.Rot | 42.8070 | 0.0488<br>0.0000 | 19.6<br>50.00         | Thu Jan 22 18:12:18 2015<br>0.00228g/mL MeOH<br>SHJ207 | Na<br>589nm           | 2 sec<br>10 sec       |

+44.150°

**Figure S9.** ORD spectrum of **1**.

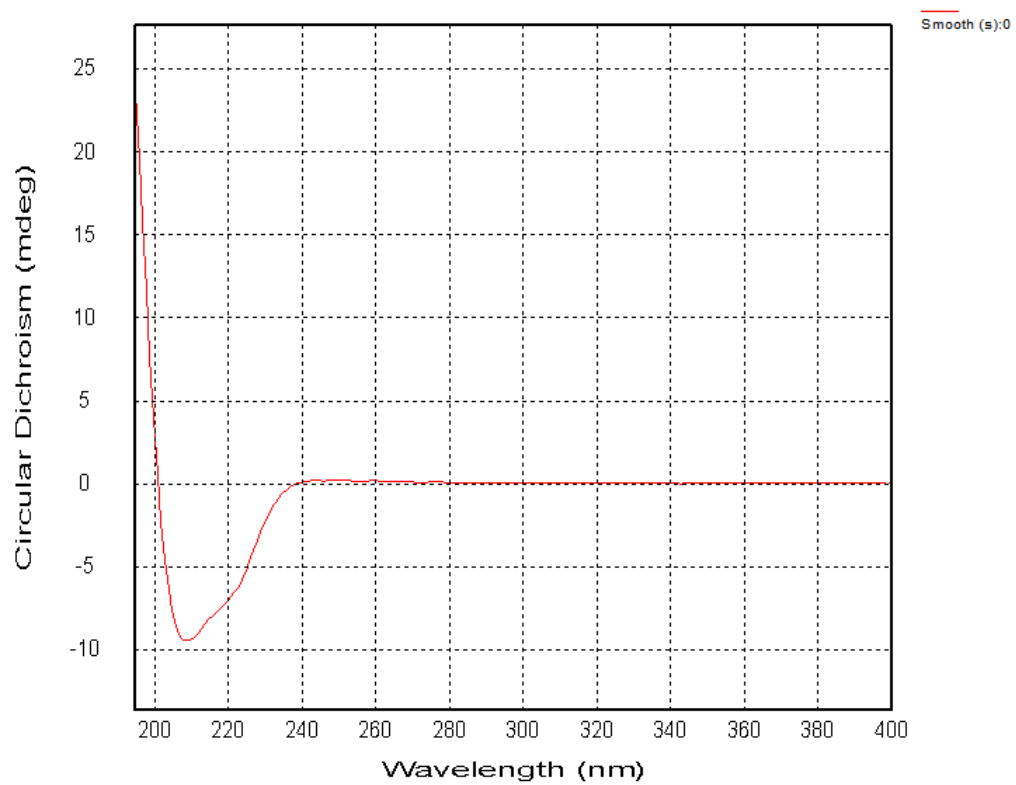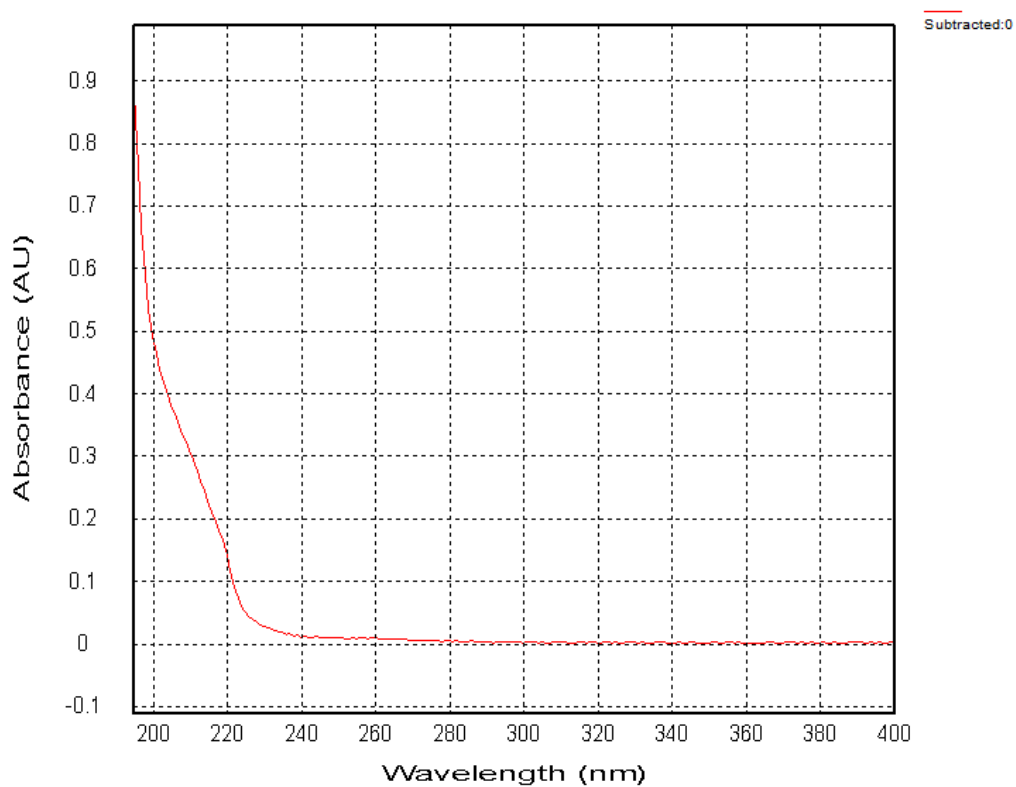

**Figure S10.** CD spectrum of **1**.

## 2. NMR, HRESIMS, UV, ORD, and CD spectra of compound 2

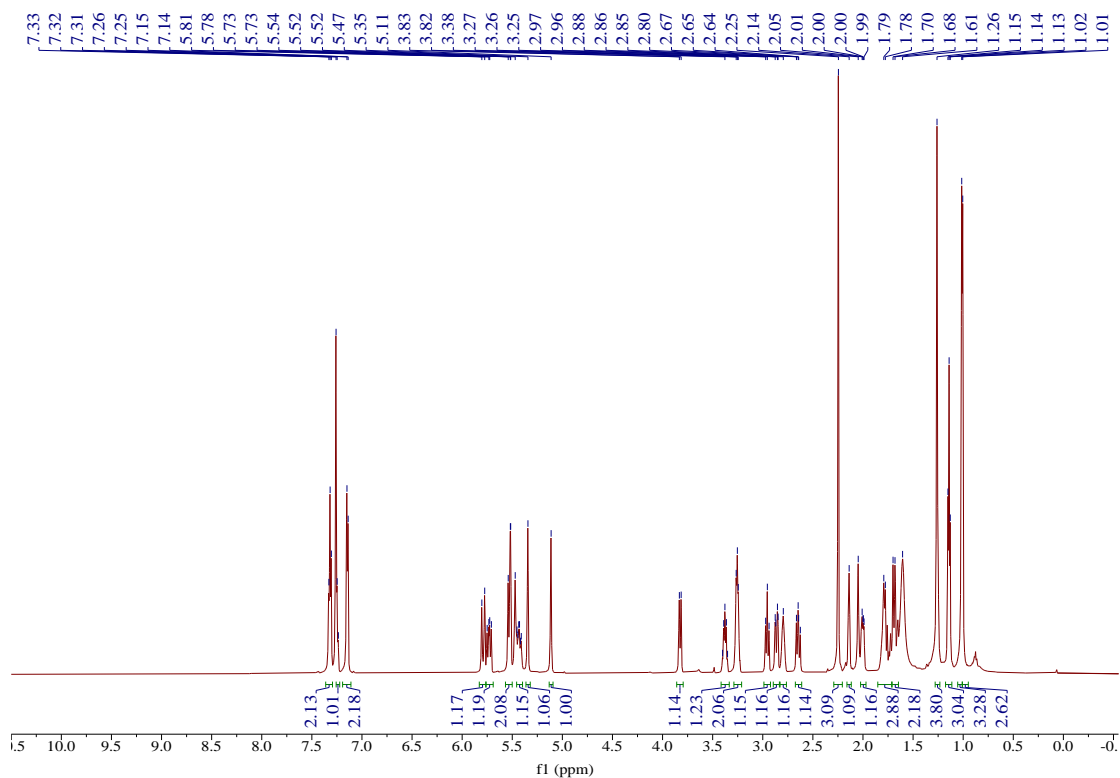

Figure S10. <sup>1</sup>H NMR spectrum of 2 (600 MHz, CDCl<sub>3</sub>).

shj07

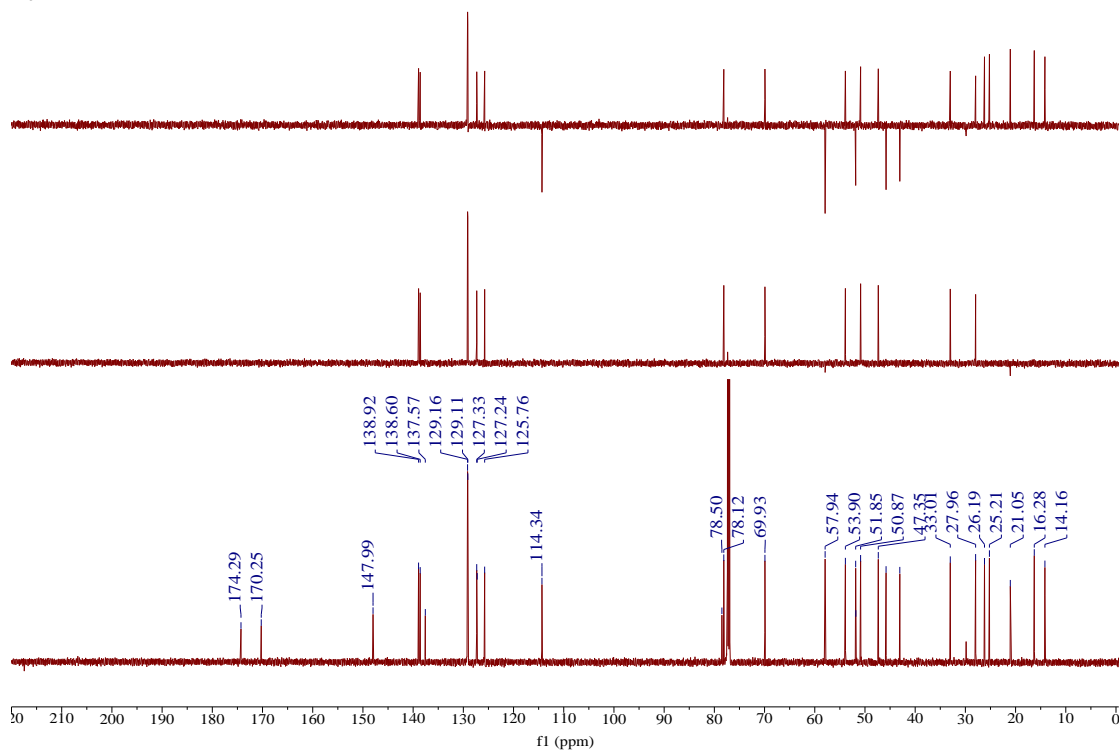

Figure S11. <sup>13</sup>C NMR, DEPT-90 and DEPT-135 spectra of 2 (150 MHz, CDCl<sub>3</sub>).

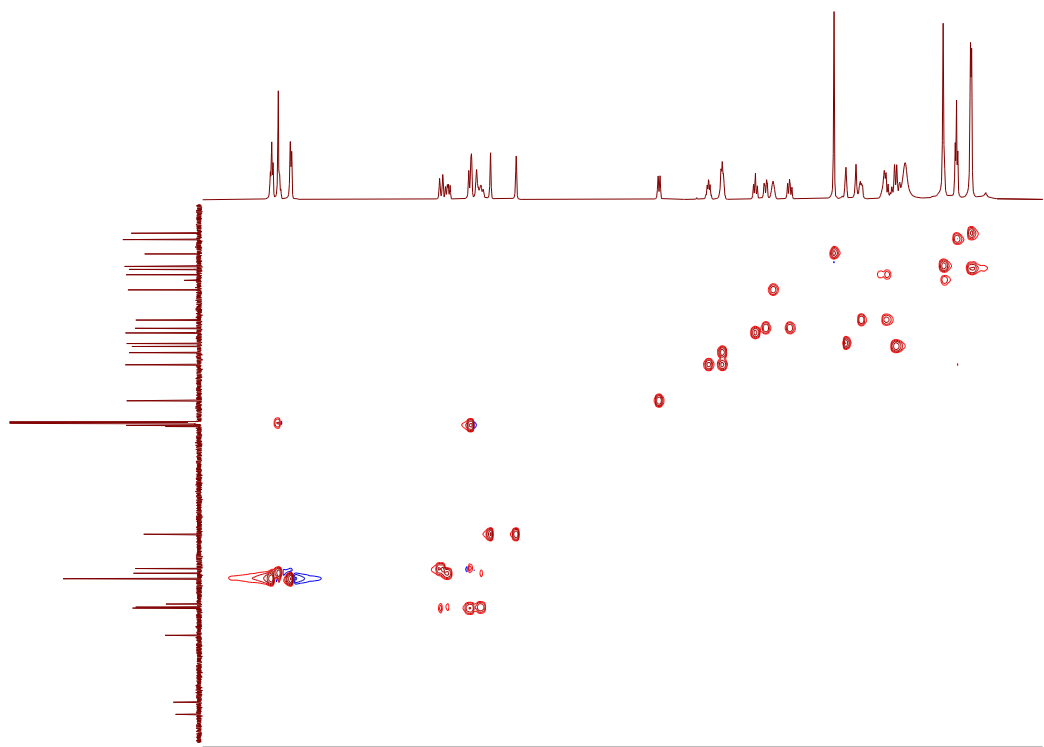

**Figure S12.** HSQC spectrum of **2** (600 MHz,  $\text{CDCl}_3$ ).

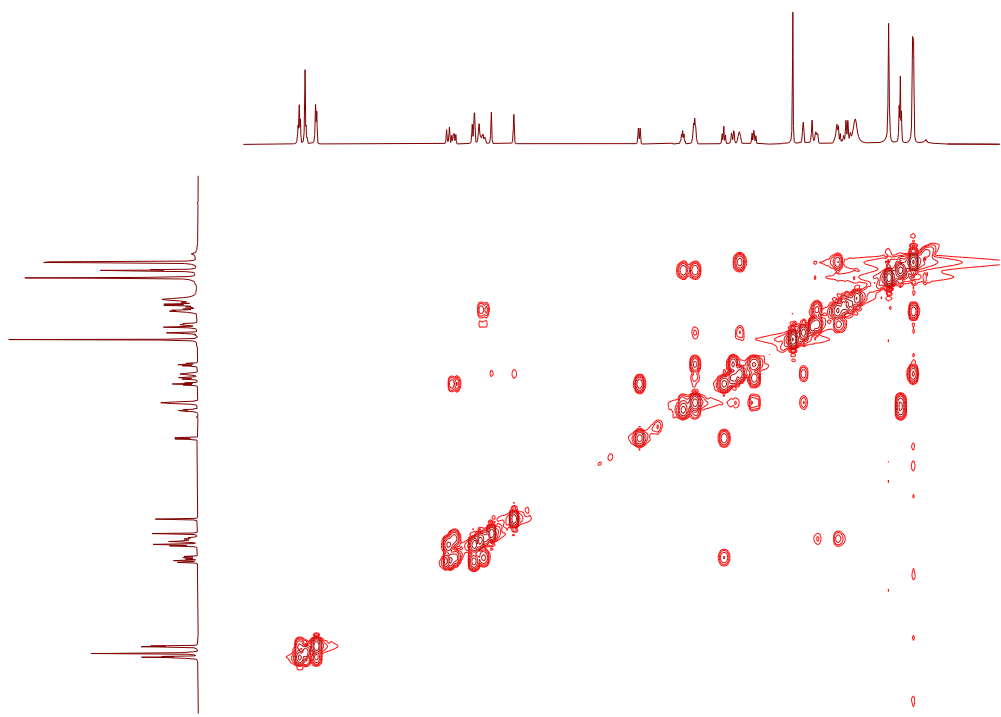

**Figure S13.**  $^1\text{H}$ - $^1\text{H}$  COSY spectrum of **2** (600 MHz,  $\text{CDCl}_3$ ).

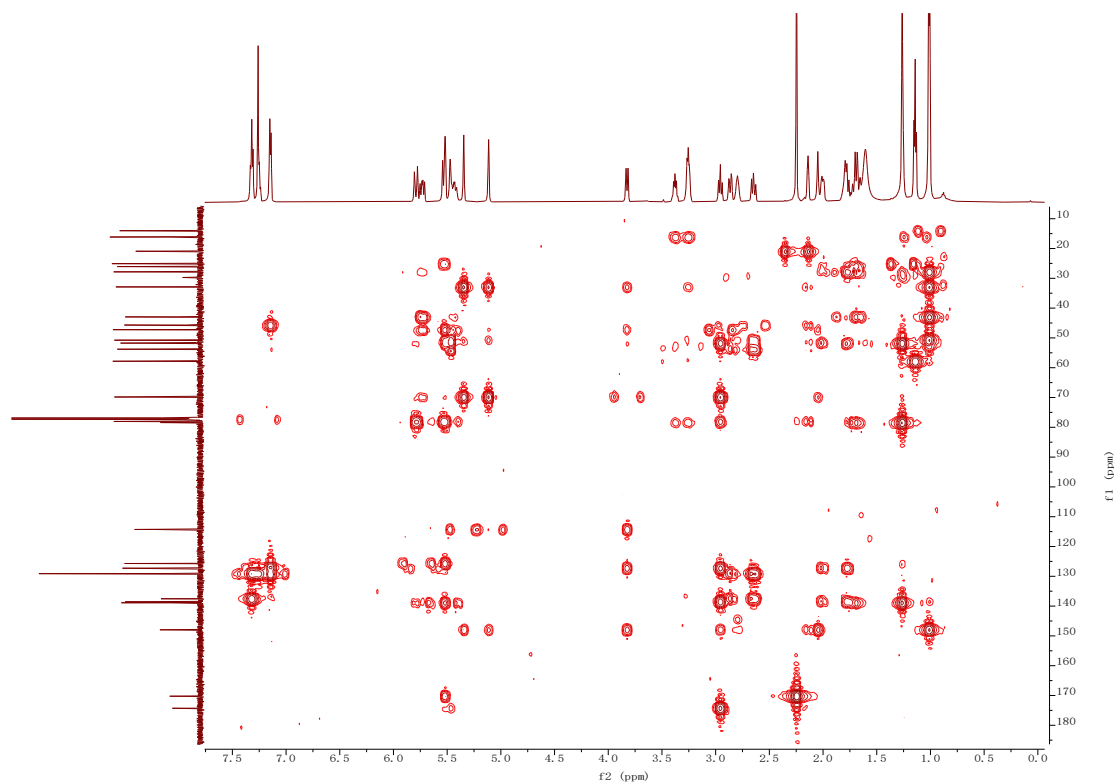

**Figure S14.** HMBC spectrum of **2** (600 MHz, CDCl<sub>3</sub>).

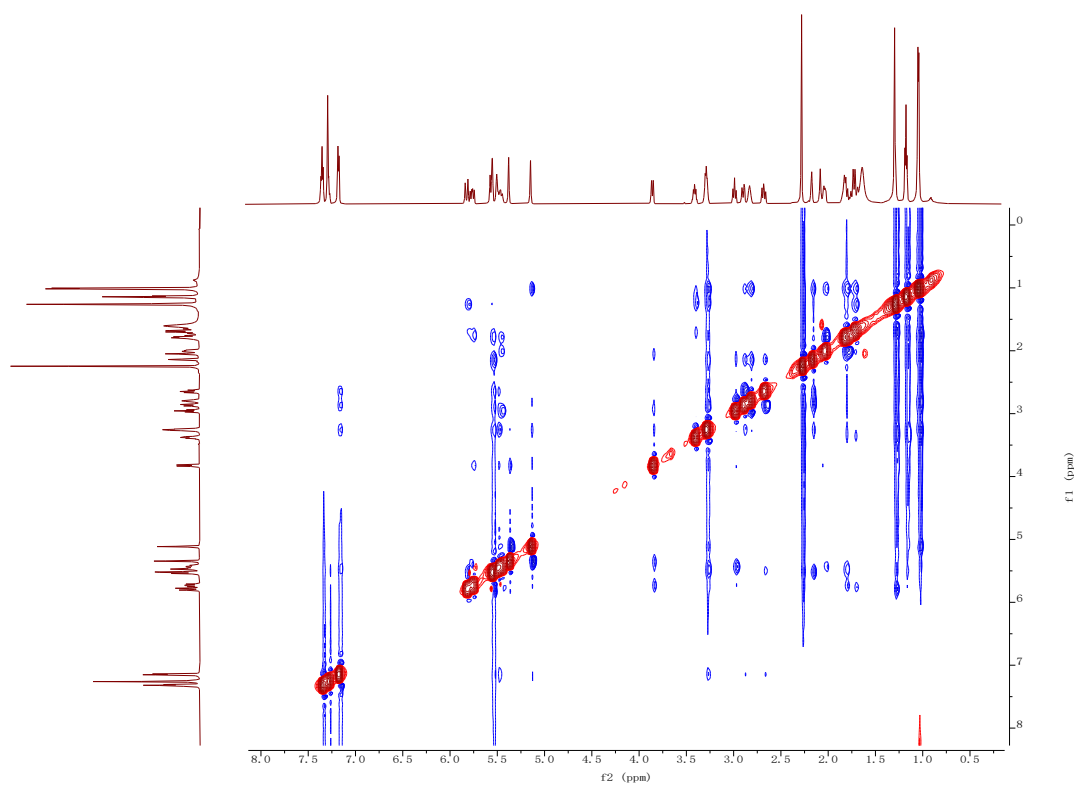

**Figure S15.** ROESY spectrum of **2** (600 MHz, CDCl<sub>3</sub>).

## Qualitative Analysis Report

|                        |                      |               |                       |
|------------------------|----------------------|---------------|-----------------------|
| Data Filename          | 141104ESIA2.d        | Sample Name   | SHJ07                 |
| Sample Type            | Sample               | Position      |                       |
| Instrument Name        | Agilent G6230 TOF MS | User Name     | KIB                   |
| Acq Method             | ESI.m                | Acquired Time | 11/4/2014 10:08:07 AM |
| IRM Calibration Status | Success              | DA Method     | demo.m                |
| Comment                |                      |               |                       |

|                |                             |       |  |
|----------------|-----------------------------|-------|--|
| Sample Group   |                             | Info. |  |
| Acquisition SW | 6200 series TOF/6500 series |       |  |
| Version        | Q-TOF B.05.01 (B5125.2)     |       |  |

### User Spectra

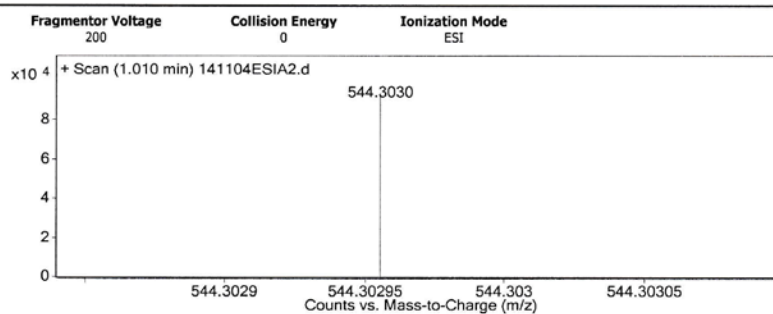

### Peak List

| m/z     | z | Abund    | Formula         | Ion |
|---------|---|----------|-----------------|-----|
| 544.303 | 1 | 93731.61 | C32 H43 N Na O5 | M+  |

### Formula Calculator Element Limits

| Element | Min | Max |
|---------|-----|-----|
| C       | 0   | 200 |
| H       | 0   | 400 |
| O       | 1   | 8   |
| Na      | 1   | 1   |
| N       | 1   | 1   |

### Formula Calculator Results

| Formula         | Calculated Mass | Mz       | Diff. (mDa) | Diff. (ppm) | DBE  |
|-----------------|-----------------|----------|-------------|-------------|------|
| C32 H43 N Na O5 | 544.3039        | 544.3030 | 0.9         | 1.6         | 11.5 |

--- End Of Report ---

**Figure S16.** HRESIMS spectrum of **2**.



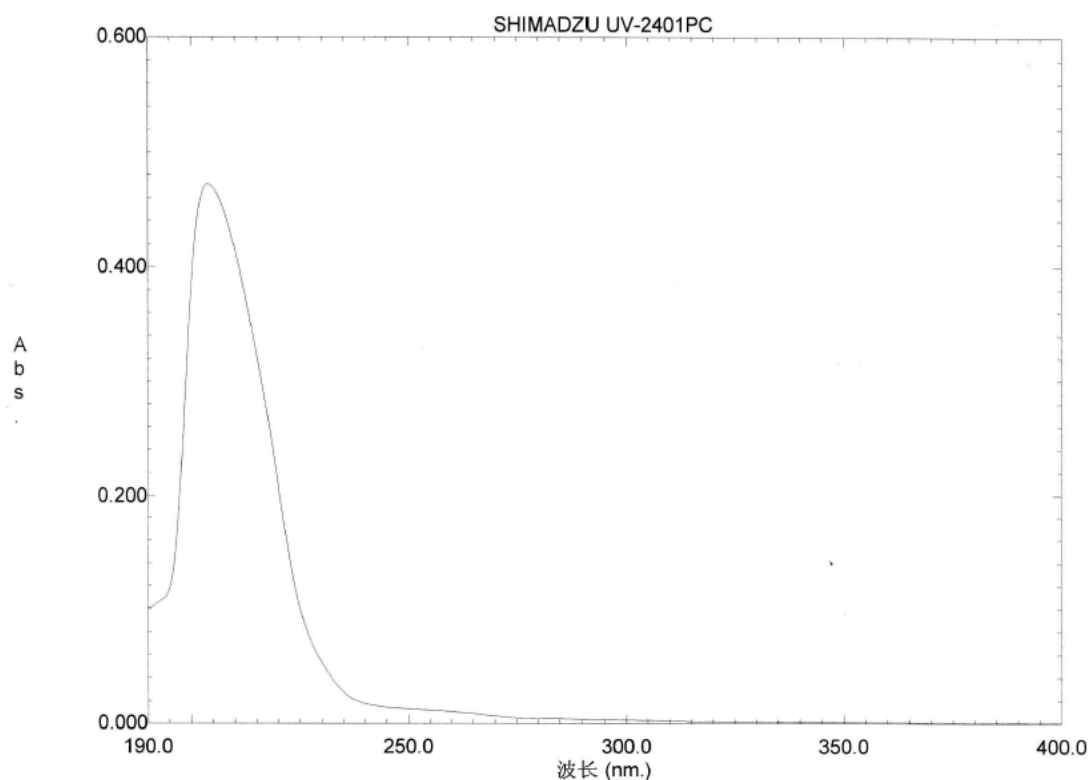

文件名: SHJ07

SHJ07

创建于: 15:53 15-01-21

样品浓度: 0.0111毫克/毫升

数据: 原始

溶剂: 甲醇

测量模式: Abs.

扫描速度: 中速

狭缝: 5.0

采样间隔: 0.2

| 否 | 波长 (nm.) | Abs.   |
|---|----------|--------|
| 1 | 204.00   | 0.4717 |

**Figure S17.** UV spectrum of **2**.

Optical rotation measurement

Model: P-1020 (A060460638)

| No.  | Sample   | Mode   | Data    | Monitor<br>Blank | Temp.<br>Cell<br>Temp Point | Date<br>Comment<br>Sample Name                        | Light<br>Filter<br>Operator | Cycle Time<br>Integ Time |
|------|----------|--------|---------|------------------|-----------------------------|-------------------------------------------------------|-----------------------------|--------------------------|
| No.1 | 17 (1/3) | Sp.Rot | 38.5710 | 0.0297<br>0.0000 | 18.1<br>50.00<br>Cell       | Tue Jan 20 20:57:47 2015<br>0.00154g/mL MeOH<br>SHJ07 | Na<br>589nm                 | 2 sec<br>10 sec          |
| No.2 | 17 (2/3) | Sp.Rot | 39.3510 | 0.0303<br>0.0000 | 18.1<br>50.00<br>Cell       | Tue Jan 20 20:58:00 2015<br>0.00154g/mL MeOH<br>SHJ07 | Na<br>589nm                 | 2 sec<br>10 sec          |
| No.3 | 17 (3/3) | Sp.Rot | 38.9610 | 0.0300<br>0.0000 | 18.1<br>50.00<br>Cell       | Tue Jan 20 20:58:13 2015<br>0.00154g/mL MeOH<br>SHJ07 | Na<br>589nm                 | 2 sec<br>10 sec          |

+38.9610°

**Figure S18.** ORD spectrum of **2**.

SHJ07

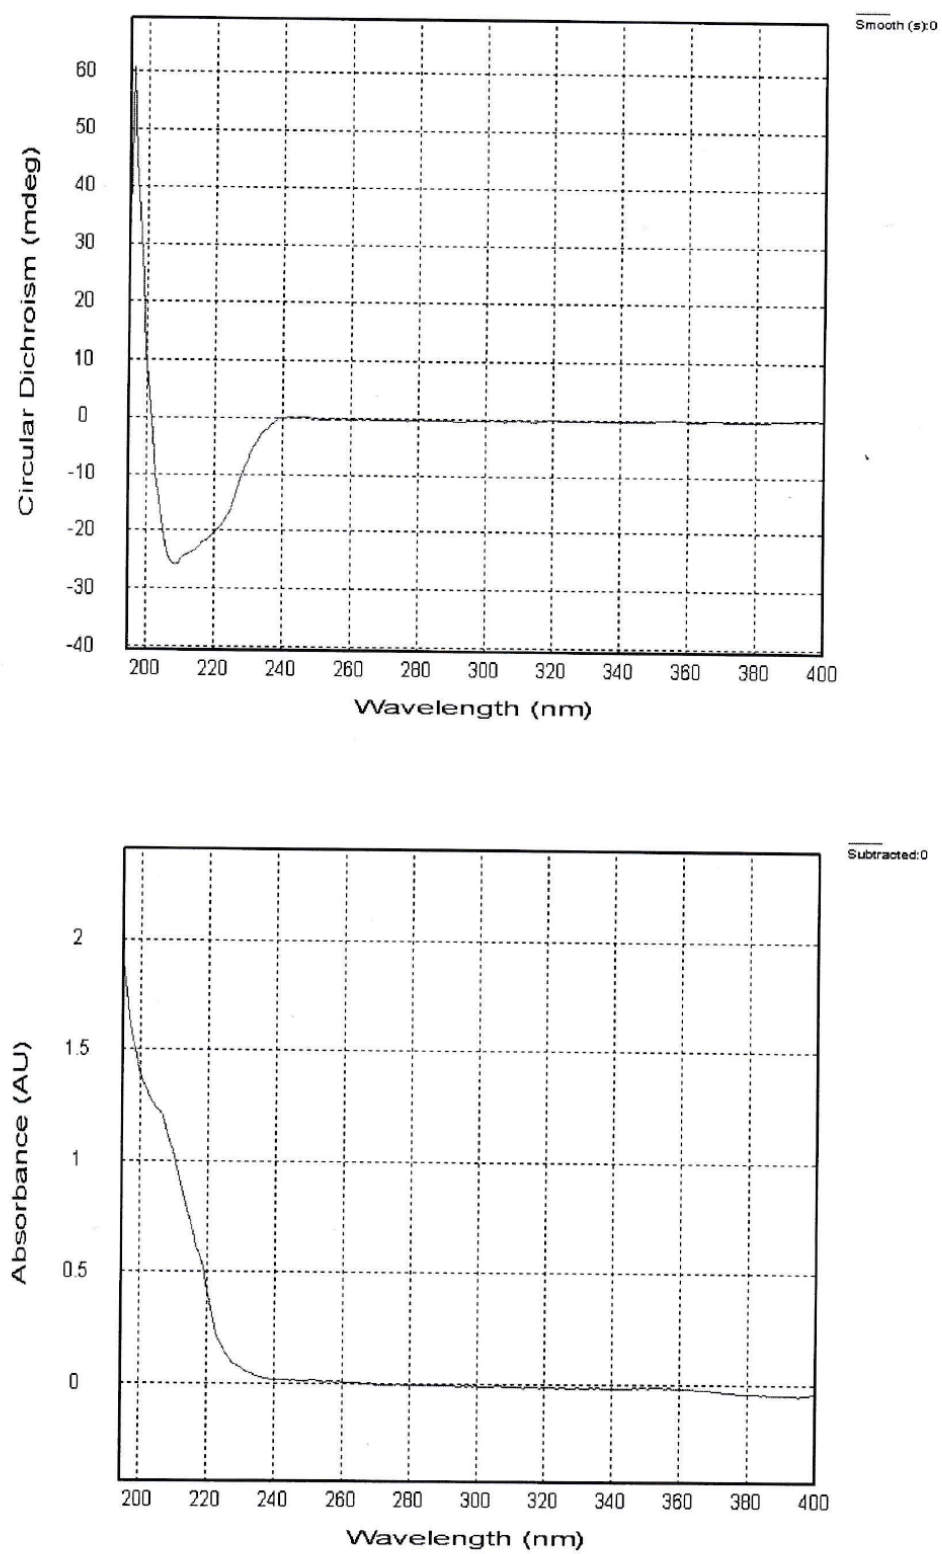

**Figure S19.** CD spectrum of **2**.

### 3. NMR, HRESIMS, UV, ORD, and CD spectra of compound **3**

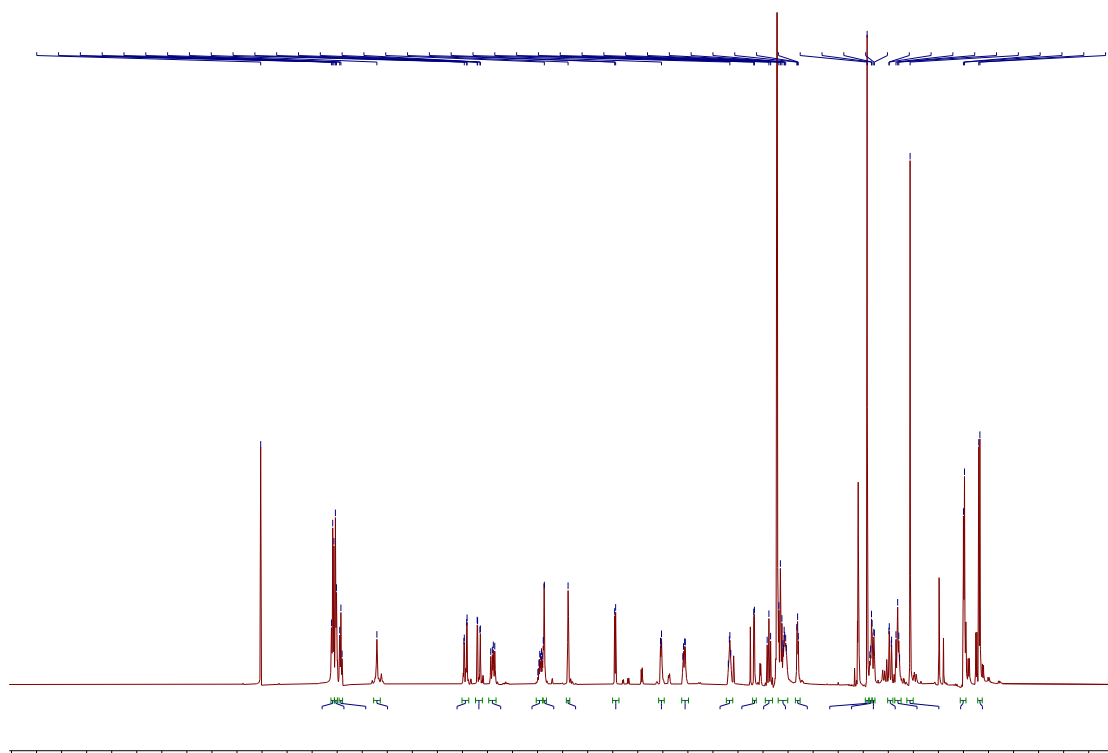

**Figure S20.**  $^1\text{H}$  NMR spectrum of **3** (600 MHz, acetone- $d_6$ ).

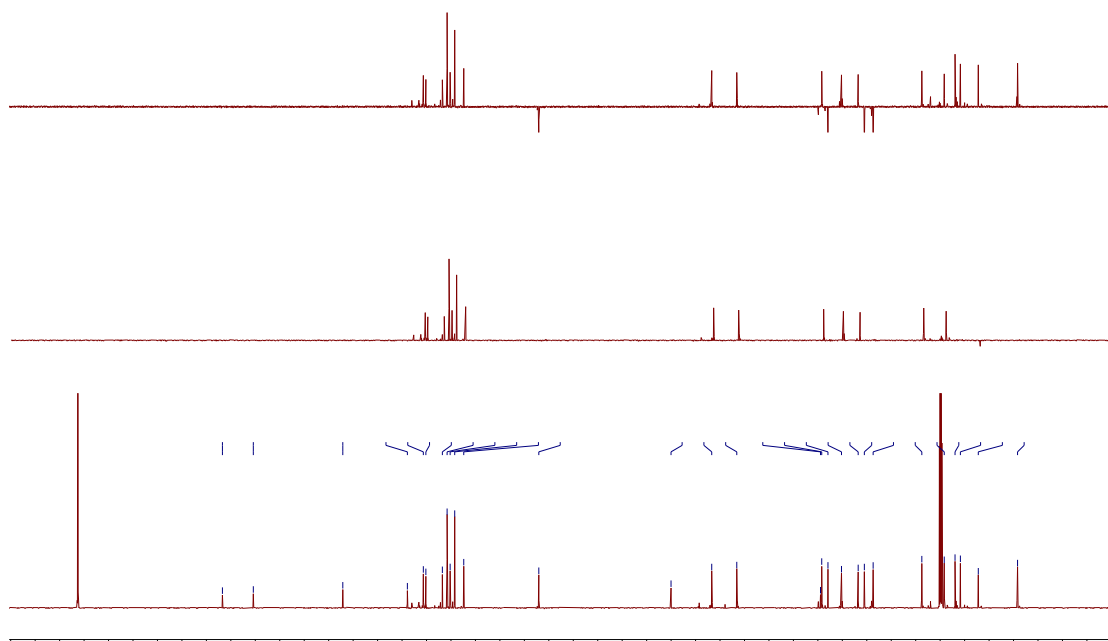

**Figure S21.**  $^{13}\text{C}$  NMR, DEPT-90 and DEPT-135 spectra of **3** (150 MHz, acetone- $d_6$ ).

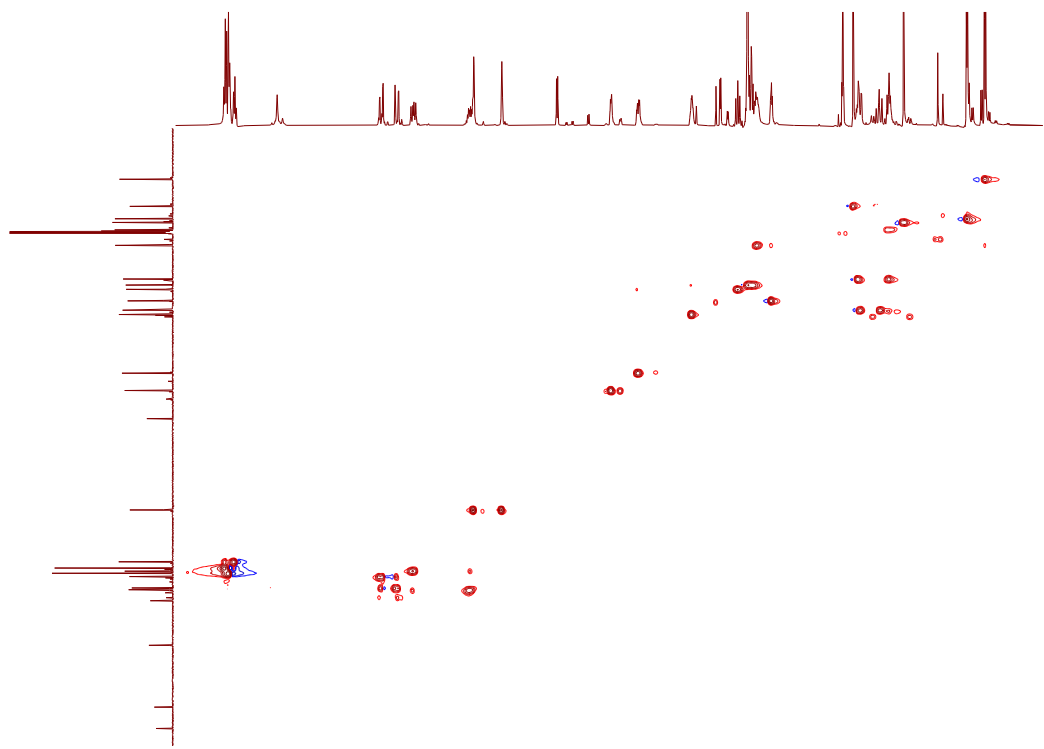

**Figure S22.** HSQC spectrum of **3** (600 MHz, acetone- $d_6$ ).

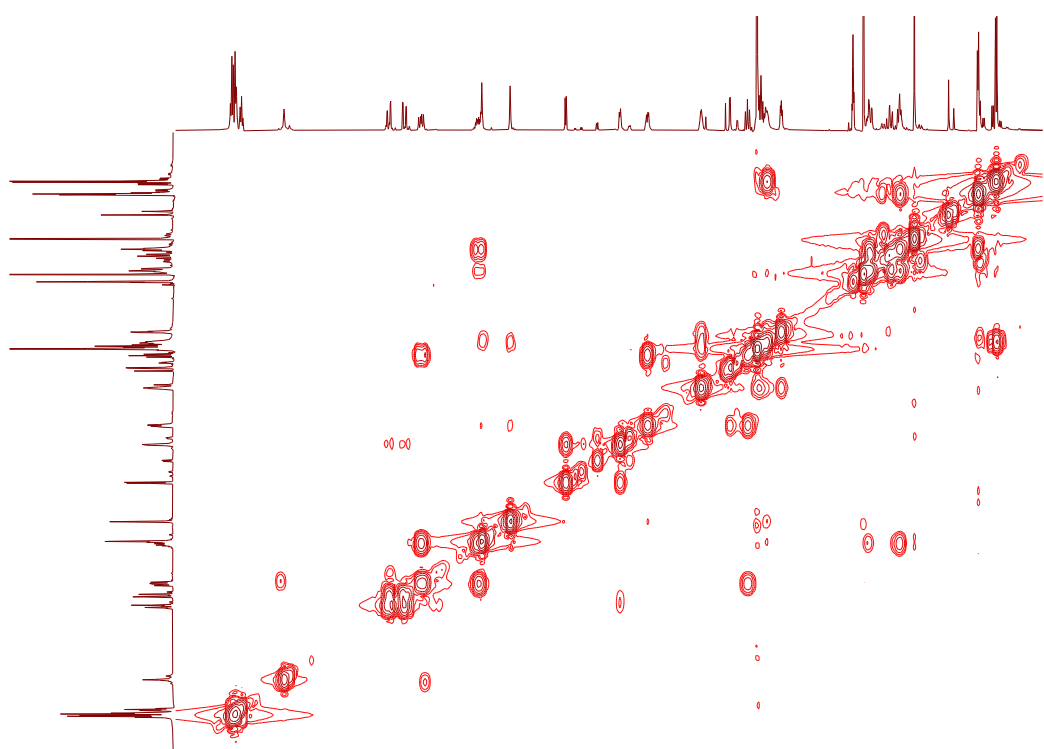

**Figure S23.**  $^1\text{H}$ - $^1\text{H}$  COSY spectrum of **3** (600 MHz, acetone- $d_6$ ).

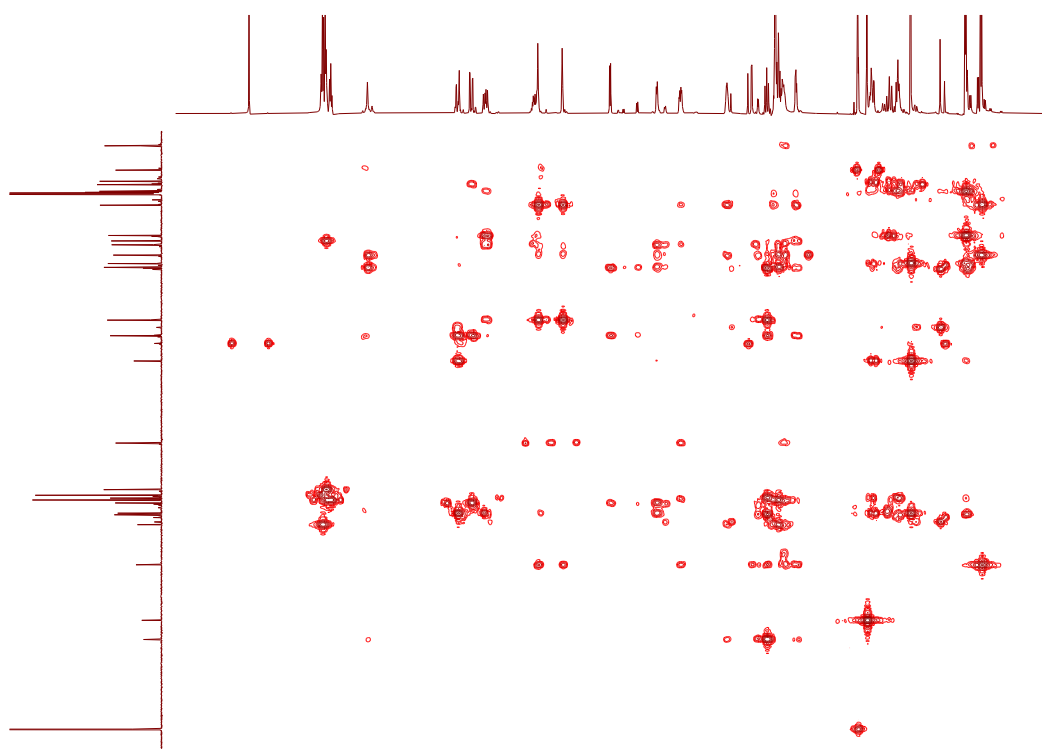

**Figure S24.** HMBC spectrum of **3** (600 MHz, acetone- $d_6$ ).

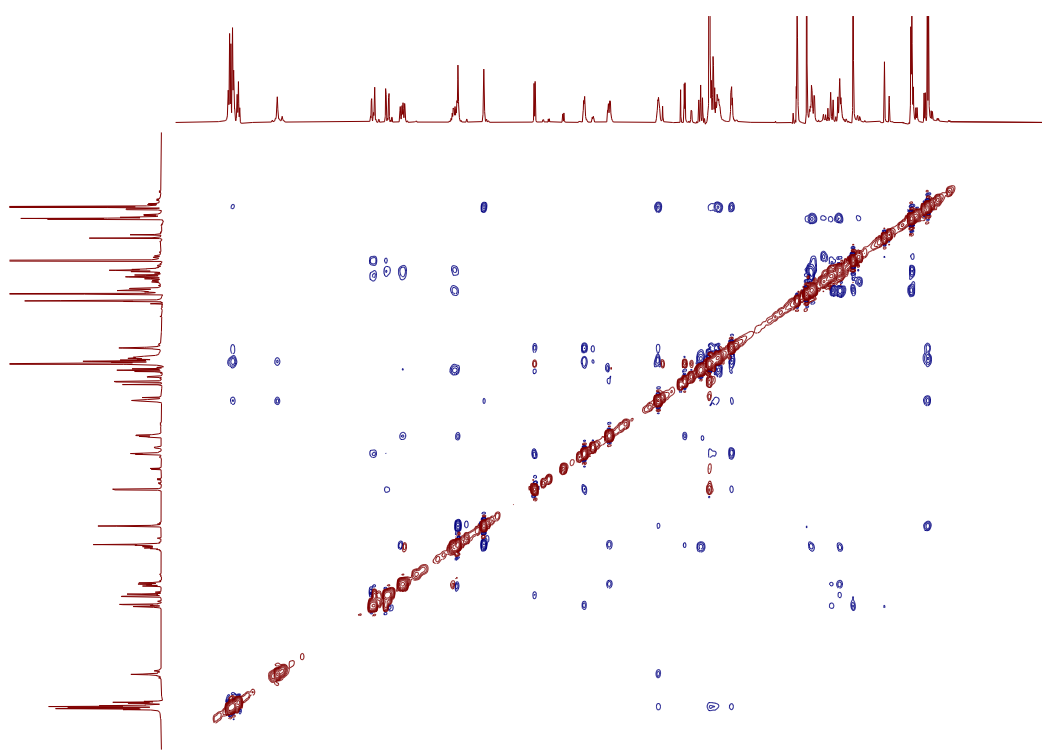

**Figure S25.** ROESY spectrum of **3** (600 MHz, acetone- $d_6$ ).

## Qualitative Analysis Report

|                        |              |               |                       |
|------------------------|--------------|---------------|-----------------------|
| Data Filename          | SHJ2061.d    | Sample Name   | SHJ2061               |
| Sample Type            | Sample       | Position      | P1-B1                 |
| Instrument Name        | Instrument 1 | User Name     |                       |
| Acq Method             | SIBU.m       | Acquired Time | 11/5/2014 10:04:48 AM |
| IRM Calibration Status | Success      | DA Method     | Default.m             |
| Comment                |              |               |                       |

|                |                             |
|----------------|-----------------------------|
| Sample Group   | Info.                       |
| Acquisition SW | 6200 series TOF/6500 series |
| Version        | Q-TOF B.05.01 (B5125.2)     |

### User Spectra

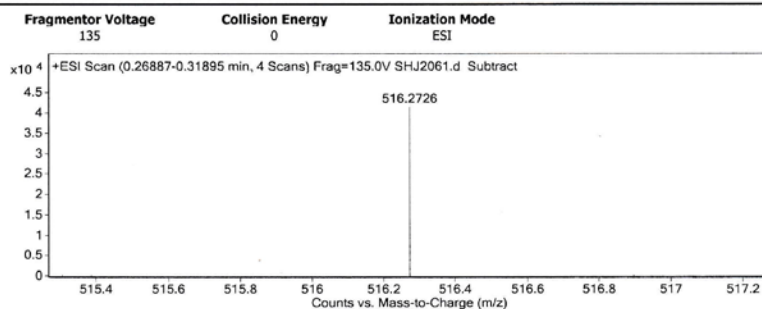

### Peak List

| m/z      | z | Abund    | Formula      | Ion     |
|----------|---|----------|--------------|---------|
| 301.1415 | 1 | 9981.23  |              |         |
| 315.1566 | 1 | 6578.91  |              |         |
| 416.2595 | 1 | 6534.67  |              |         |
| 434.269  | 1 | 14929.77 |              |         |
| 435.2731 | 1 | 5252.26  |              |         |
| 494.2906 | 1 | 24097.41 |              |         |
| 495.2942 | 1 | 8625.36  |              |         |
| 516.2726 | 1 | 41536.34 | C30 H39 N O5 | (M+Na)+ |
| 517.2759 | 1 | 12547.21 | C30 H39 N O5 | (M+Na)+ |
| 652.2481 | 1 | 5529.75  |              |         |

### Formula Calculator Element Limits

| Element | Min | Max |
|---------|-----|-----|
| C       | 3   | 60  |
| H       | 0   | 120 |
| O       | 0   | 30  |
| N       | 0   | 5   |

### Formula Calculator Results

| Formula      | CalculatedMass | CalculatedMz | Mz       | Diff. (mDa) | Diff. (ppm) | DBE     |
|--------------|----------------|--------------|----------|-------------|-------------|---------|
| C30 H39 N O5 | 493.2828       | 516.2720     | 516.2726 | -0.6        | -1.2        | 12.0000 |

--- End Of Report ---

Figure S26. HRESIMS spectrum of 3.

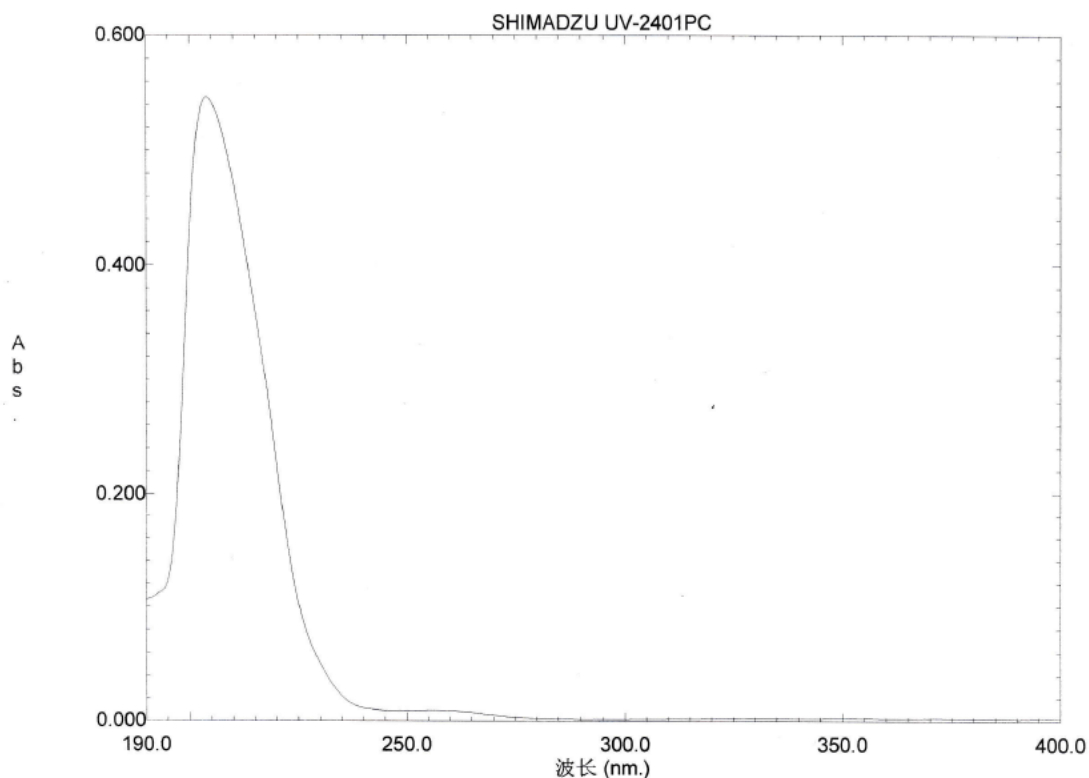

文件名: 15012103  
样品名称: SHJ2061

15012103

创建于: 16:39 15-01-21  
数据: 原始

样品浓度: 0.0108毫克/毫升  
溶剂: 甲醇

测量模式: Abs.  
扫描速度: 中速  
狭缝: 5.0  
采样间隔: 0.2

| 否. | 波长 (nm.) | Abs.   |
|----|----------|--------|
| 1  | 204.00   | 0.5467 |

**Figure S27.** UV spectrum of **3**.

Optical rotation measurement

Model: P-1020 (A060460638)

| No.  | Sample  | Mode   | Data    | Monitor<br>Blank | Temp.<br>Cell<br>Temp Point | Date<br>Comment<br>Sample Name                          | Light<br>Filter<br>Operator | Cycle Time<br>Integ Time |
|------|---------|--------|---------|------------------|-----------------------------|---------------------------------------------------------|-----------------------------|--------------------------|
| No.1 | 8 (1/3) | Sp.Rot | 22.4690 | 0.0273<br>0.0000 | 21.5<br>50.00<br>Cell       | Wed Oct 29 20:34:44 2014<br>0.00243g/mL MeOH<br>SHJ2061 | Na<br>589nm                 | 2 sec<br>10 sec          |
| No.2 | 8 (2/3) | Sp.Rot | 20.9880 | 0.0255<br>0.0000 | 21.5<br>50.00<br>Cell       | Wed Oct 29 20:34:57 2014<br>0.00243g/mL MeOH<br>SHJ2061 | Na<br>589nm                 | 2 sec<br>10 sec          |
| No.3 | 8 (3/3) | Sp.Rot | 22.5510 | 0.0274<br>0.0000 | 21.6<br>50.00<br>Cell       | Wed Oct 29 20:35:10 2014<br>0.00243g/mL MeOH<br>SHJ2061 | Na<br>589nm                 | 2 sec<br>10 sec          |

+22.0027°

**Figure S28.** ORD spectrum of **3**.

SHJ2061

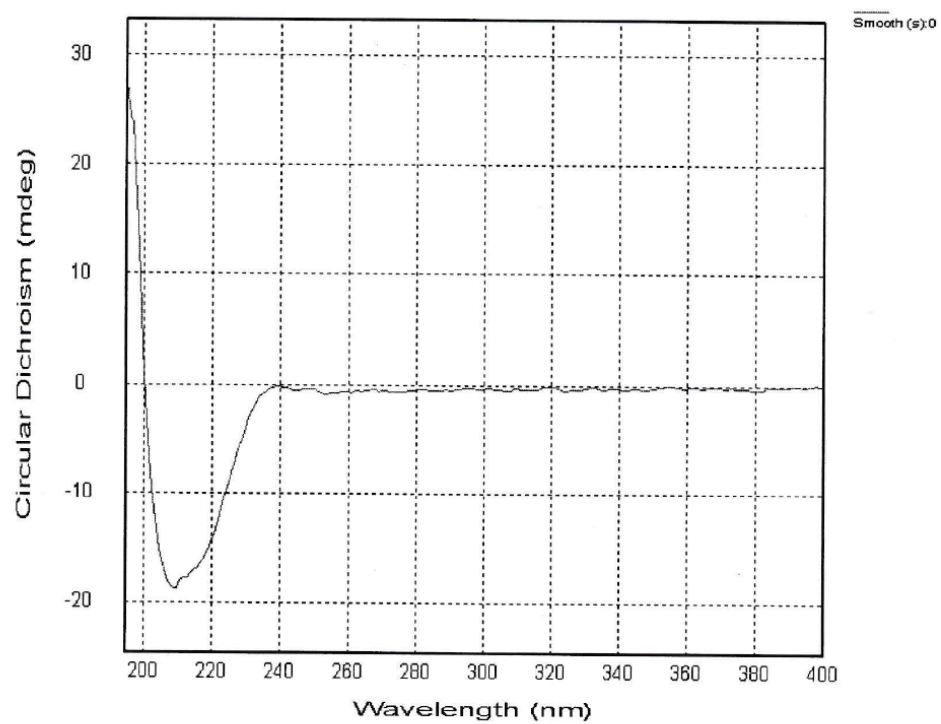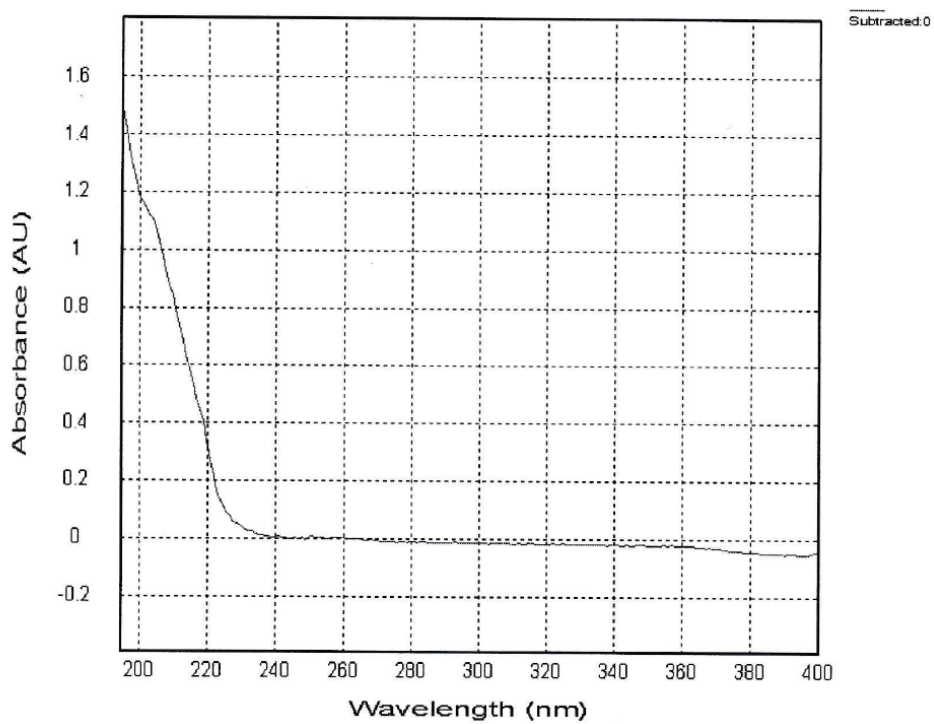

**Figure S29.** CD spectrum of **3**.



#### 4. NMR, HRESIMS, UV, ORD, and CD spectra of compound **4**

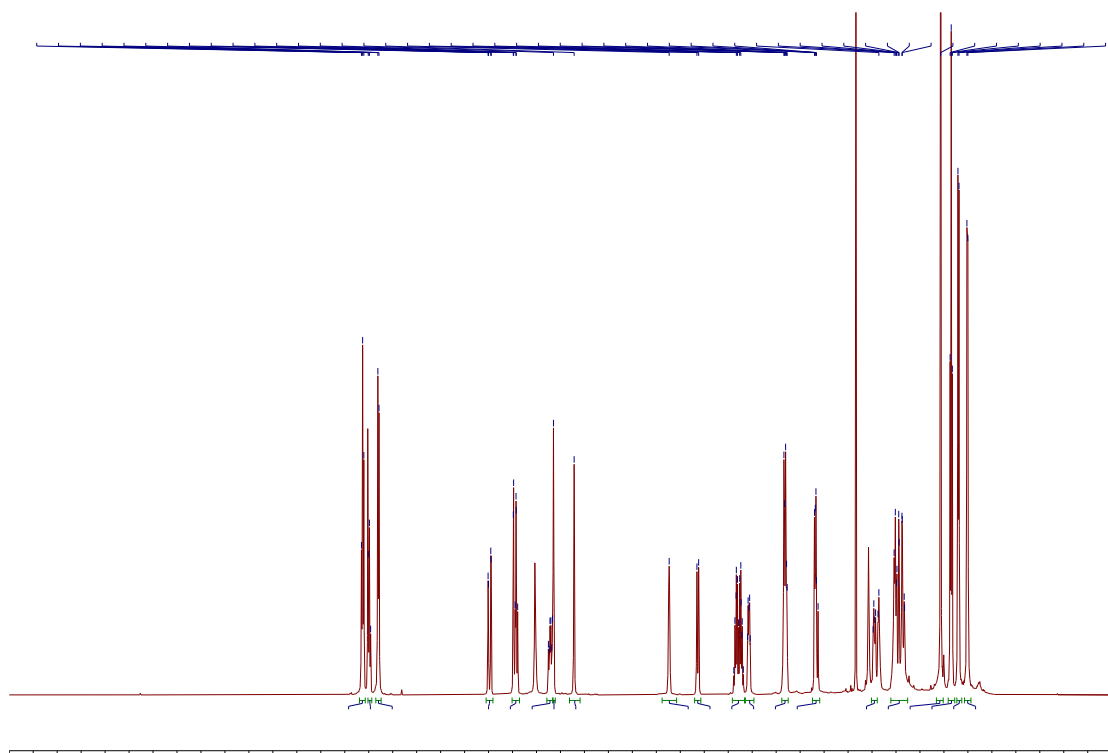

**Figure S30.**  $^1\text{H}$  NMR spectrum of **4** (600 MHz,  $\text{CDCl}_3$ ).

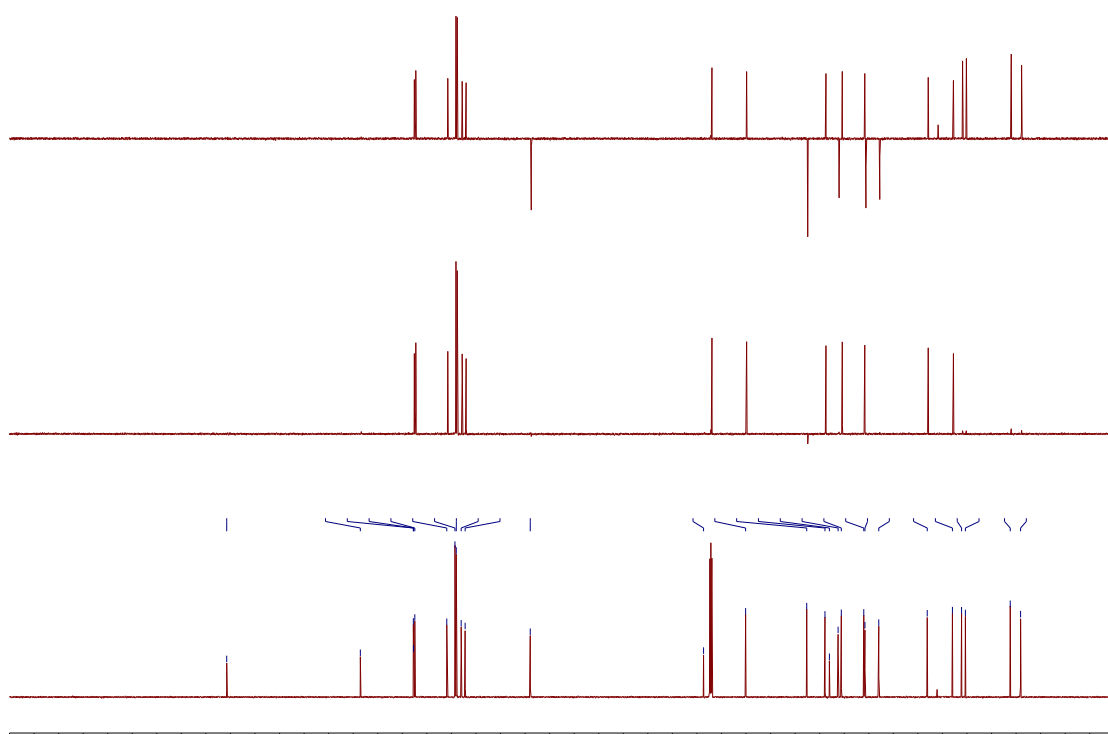

**Figure S31.**  $^{13}\text{C}$  NMR, DEPT-90 and DEPT-135 spectra of **4** (150 MHz,  $\text{CDCl}_3$ ).

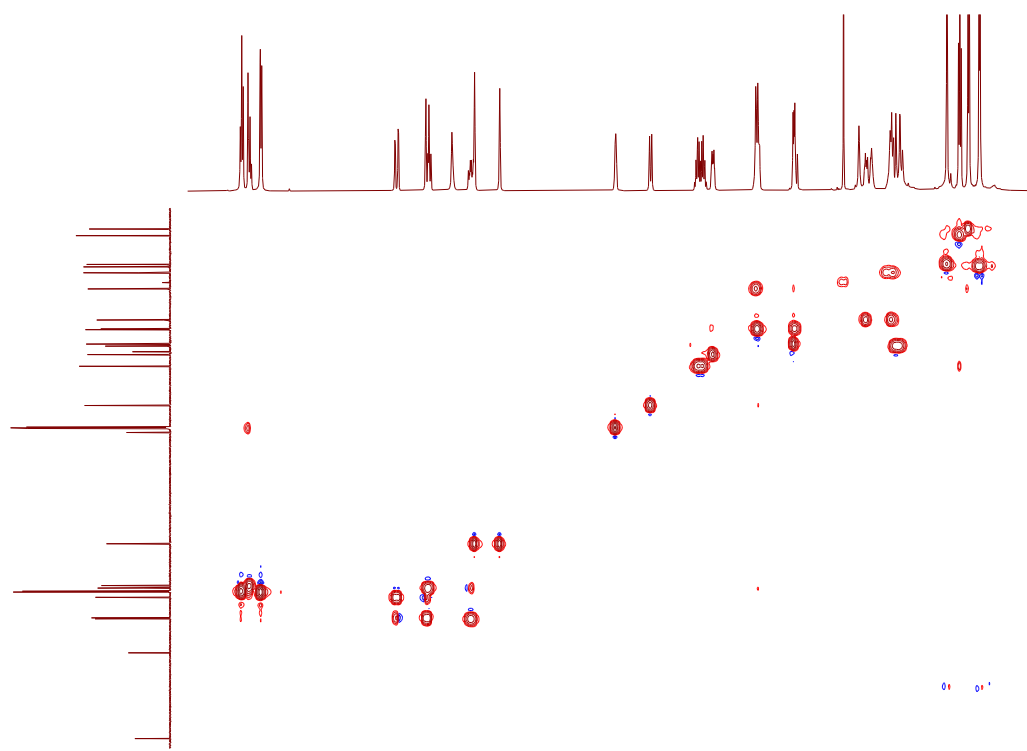

**Figure S32.** HSQC spectrum of **4** (600 MHz, CDCl<sub>3</sub>).

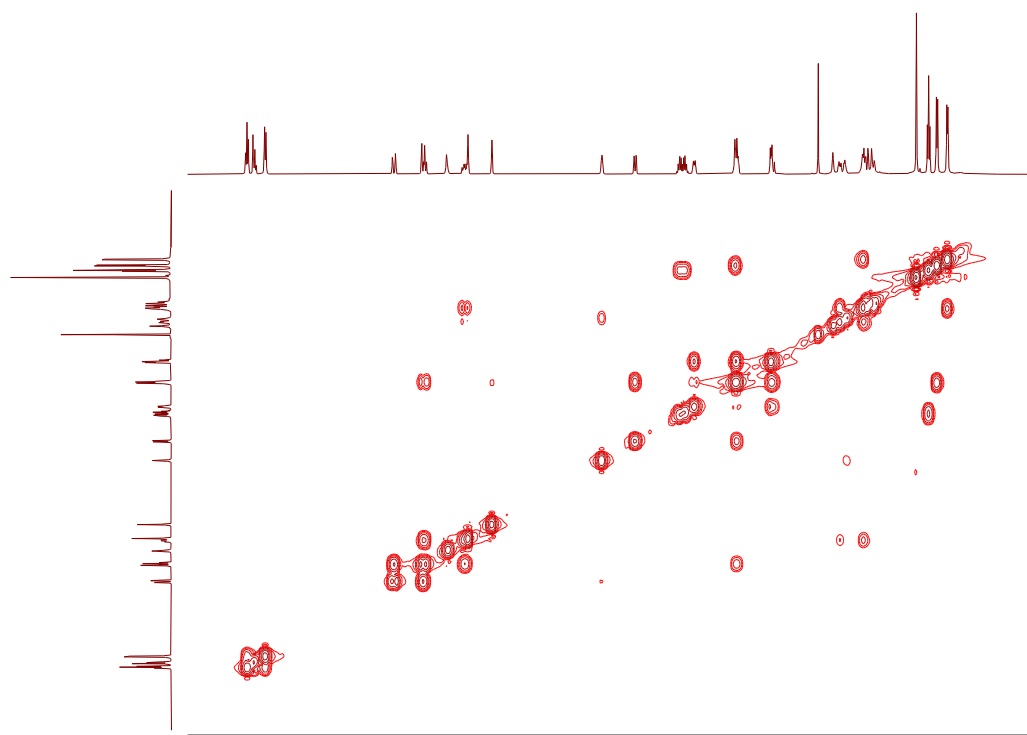

**Figure S33.** <sup>1</sup>H-<sup>1</sup>H COSY spectrum of **4** (600 MHz, CDCl<sub>3</sub>).

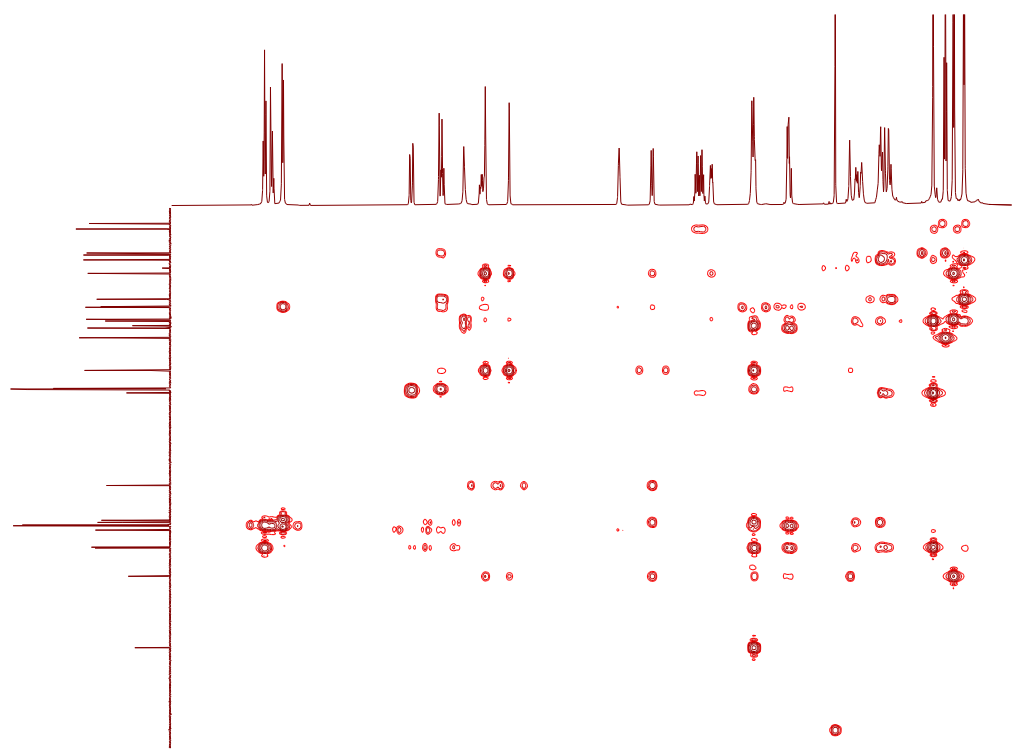

**Figure S34.** HMBC spectrum of **4** (600 MHz,  $\text{CDCl}_3$ ).

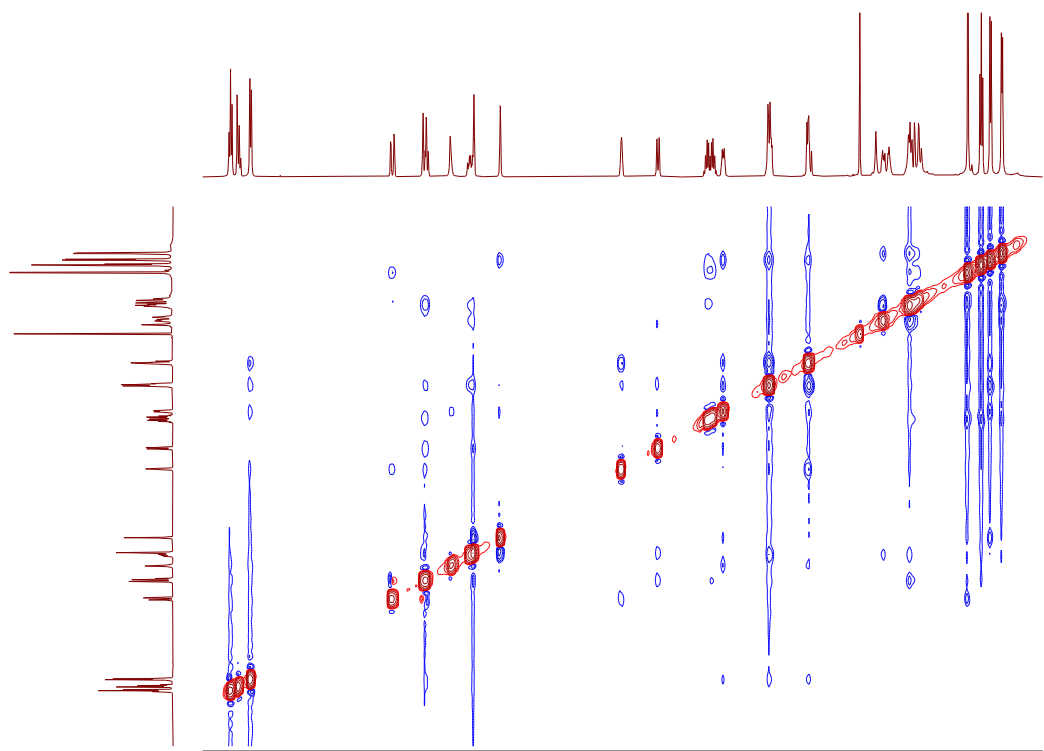

**Figure S35.** ROESY spectrum of **4** (600 MHz,  $\text{CDCl}_3$ ).

## Qualitative Analysis Report

|                        |              |               |                       |
|------------------------|--------------|---------------|-----------------------|
| Data Filename          | SHJ13.d      | Sample Name   | SHJ13                 |
| Sample Type            | Sample       | Position      | P1-A2                 |
| Instrument Name        | Instrument 1 | User Name     |                       |
| Acq Method             | SIBU.m       | Acquired Time | 12/25/2014 3:10:10 PM |
| IRM Calibration Status | Success      | DA Method     | Default.m             |
| Comment                |              |               |                       |

  

|                |                             |
|----------------|-----------------------------|
| Sample Group   | Info.                       |
| Acquisition SW | 6200 series TOF/6500 series |
| Version        | Q-TOF B.05.01 (B5125.2)     |

### User Spectra

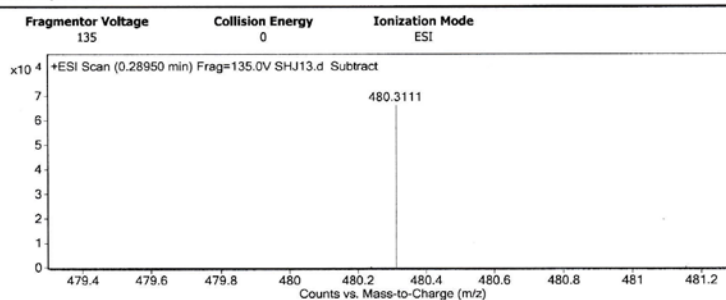

### Peak List

| m/z      | z | Abund    | Formula      | Ion    |
|----------|---|----------|--------------|--------|
| 434.2692 | 1 | 20036.47 |              |        |
| 480.3111 | 1 | 66189.3  | C30 H41 N O4 | (M+H)+ |
| 502.2929 | 1 | 45060.74 |              |        |
| 981.5964 | 1 | 33772.45 |              |        |
| 982.6006 | 1 | 21777.8  |              |        |

### Formula Calculator Element Limits

| Element | Min | Max |
|---------|-----|-----|
| C       | 3   | 60  |
| H       | 0   | 120 |
| O       | 0   | 30  |
| N       | 0   | 5   |

### Formula Calculator Results

| Formula      | CalculatedMass | CalculatedMz | Mz       | Diff. (mDa) | Diff. (ppm) | DBE     |
|--------------|----------------|--------------|----------|-------------|-------------|---------|
| C30 H41 N O4 | 479.3036       | 480.3108     | 480.3111 | -0.2        | -0.5        | 11.0000 |

--- End Of Report ---

**Figure S36.** HRESIMS spectrum of **4**.

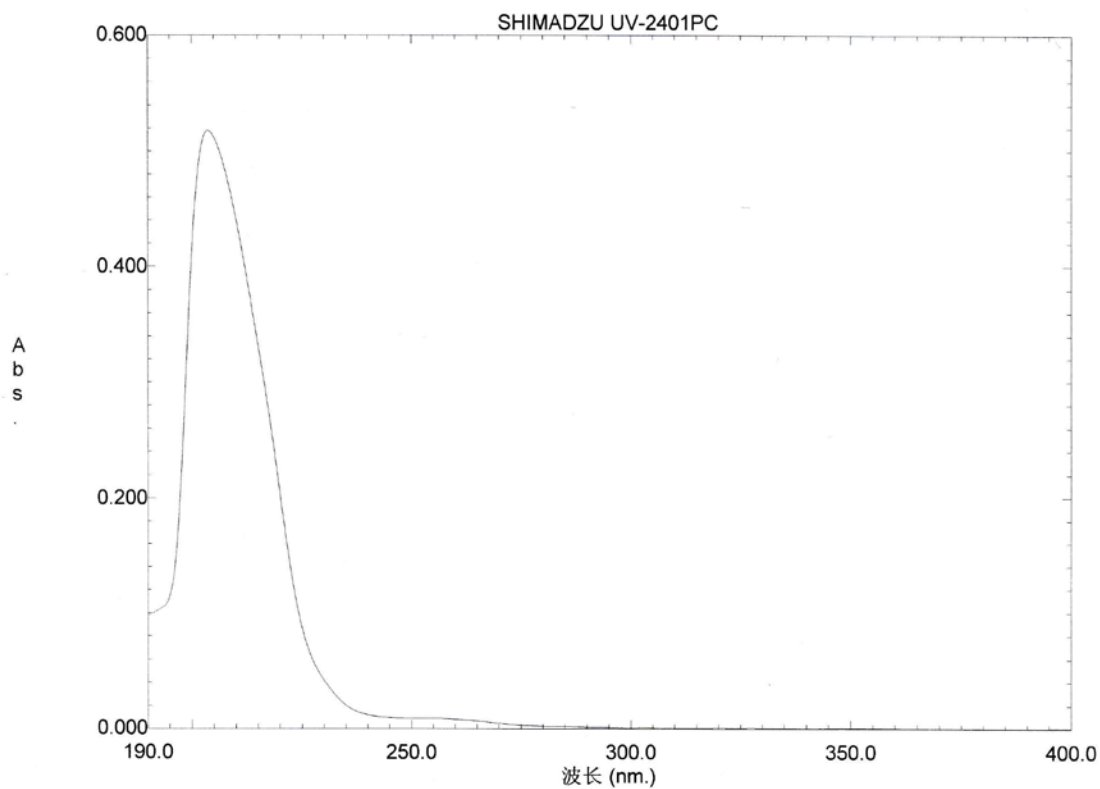

文件名: SHJ13

SHJ13

创建于: 16:09 15-01-21

样品浓度: 0.0086毫克/毫升

数据: 原始

溶剂: 甲醇

测量模式: Abs.  
扫描速度: 中速  
狭缝: 5.0  
采样间隔: 0.2

| 否. | 波长 (nm.) | Abs.   |
|----|----------|--------|
| 1  | 203.80   | 0.5179 |

Figure S37. UV spectrum of 4.

Optical rotation measurement

Model: P-1020 (A060460638)

| No.  | Sample   | Mode   | Data    | Monitor Blank    | Temp. Cell Temp Point | Date Comment Sample Name                              | Light Filter Operator | Cycle Time Integ Time |
|------|----------|--------|---------|------------------|-----------------------|-------------------------------------------------------|-----------------------|-----------------------|
| No.1 | 18 (1/3) | Sp.Rot | 49.1100 | 0.0469<br>0.0000 | 18.2<br>50.00         | Tue Jan 20 21:11:24 2015<br>0.00191g/mL MeOH<br>SHJ13 | Na<br>589nm           | 2 sec<br>10 sec       |
| No.2 | 18 (2/3) | Sp.Rot | 50.1570 | 0.0479<br>0.0000 | 18.2<br>50.00         | Tue Jan 20 21:11:37 2015<br>0.00191g/mL MeOH<br>SHJ13 | Na<br>589nm           | 2 sec<br>10 sec       |
| No.3 | 18 (3/3) | Sp.Rot | 50.6810 | 0.0484<br>0.0000 | 18.2<br>50.00         | Tue Jan 20 21:11:51 2015<br>0.00191g/mL MeOH<br>SHJ13 | Na<br>589nm           | 2 sec<br>10 sec       |

+49.985°

Figure S38. ORD spectrum of 4.

SHJ13

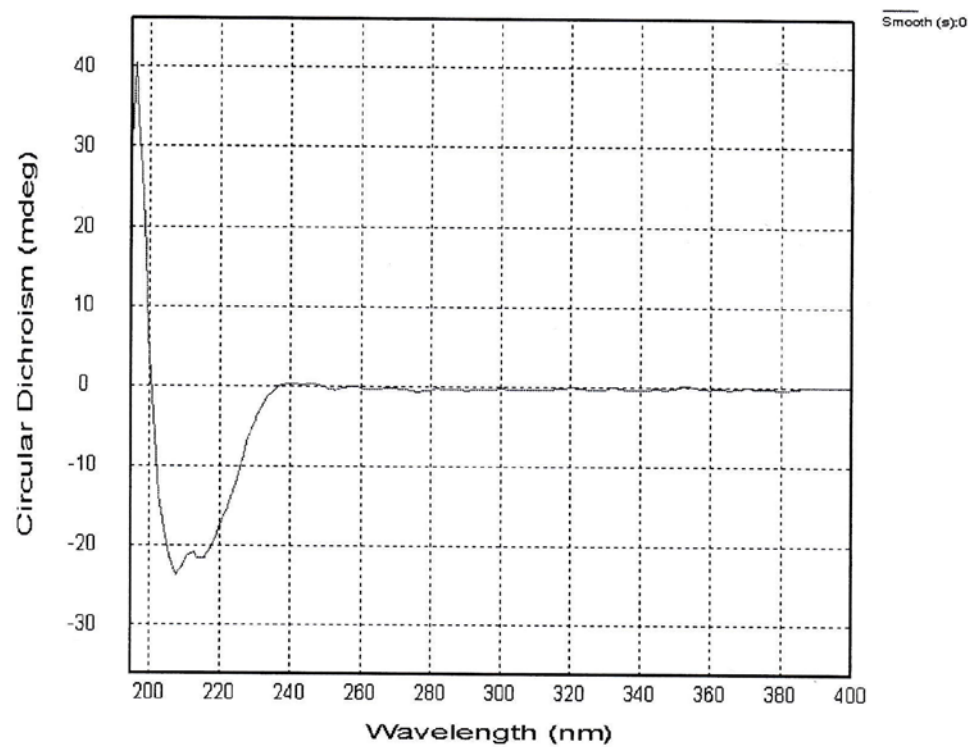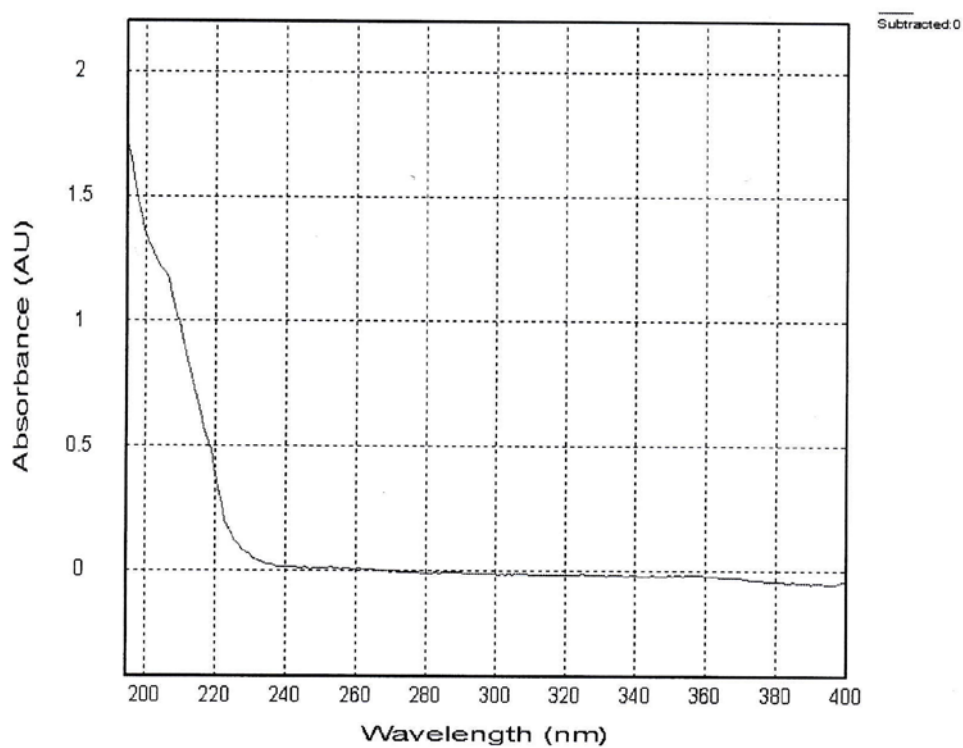

**Figure S39.** CD spectrum of **4**.

5. NMR, HRESIMS, UV, ORD, and CD spectra of compound **5**

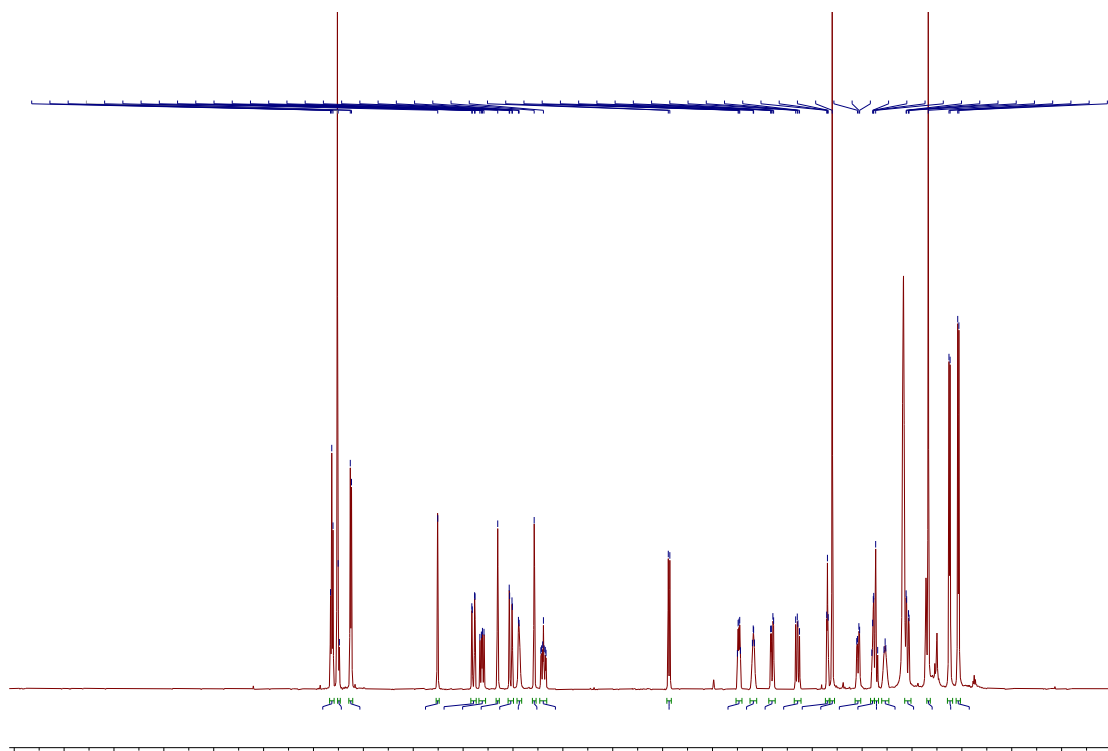

**Figure S40.**  $^1\text{H}$  NMR spectrum of **5** (600 MHz,  $\text{CDCl}_3$ ).

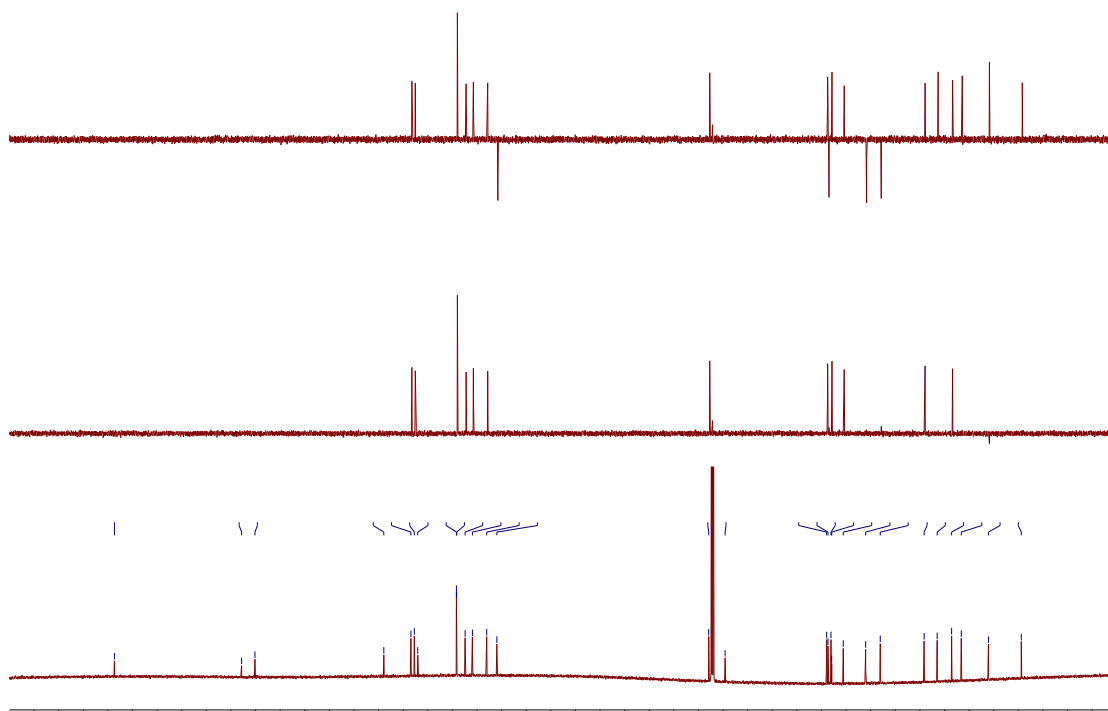

**Figure S41.**  $^{13}\text{C}$  NMR, DEPT-90 and DEPT-135 spectra of **5** (150 MHz,  $\text{CDCl}_3$ ).

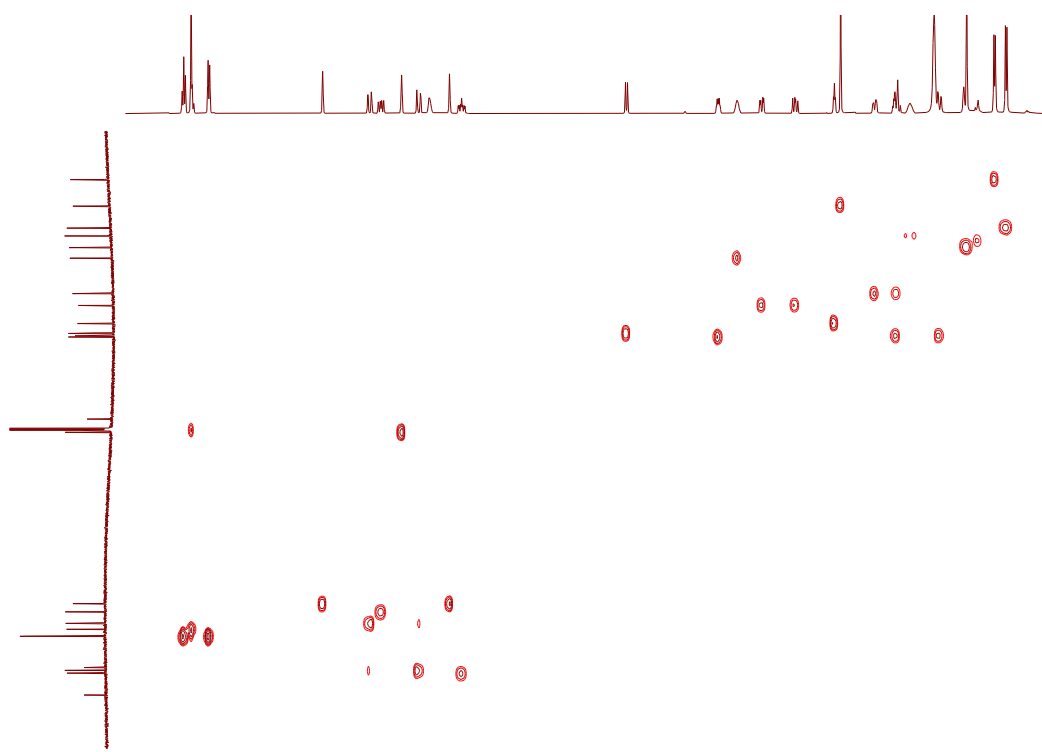

**Figure S42.** HSQC spectrum of **5** (600 MHz, CDCl<sub>3</sub>).

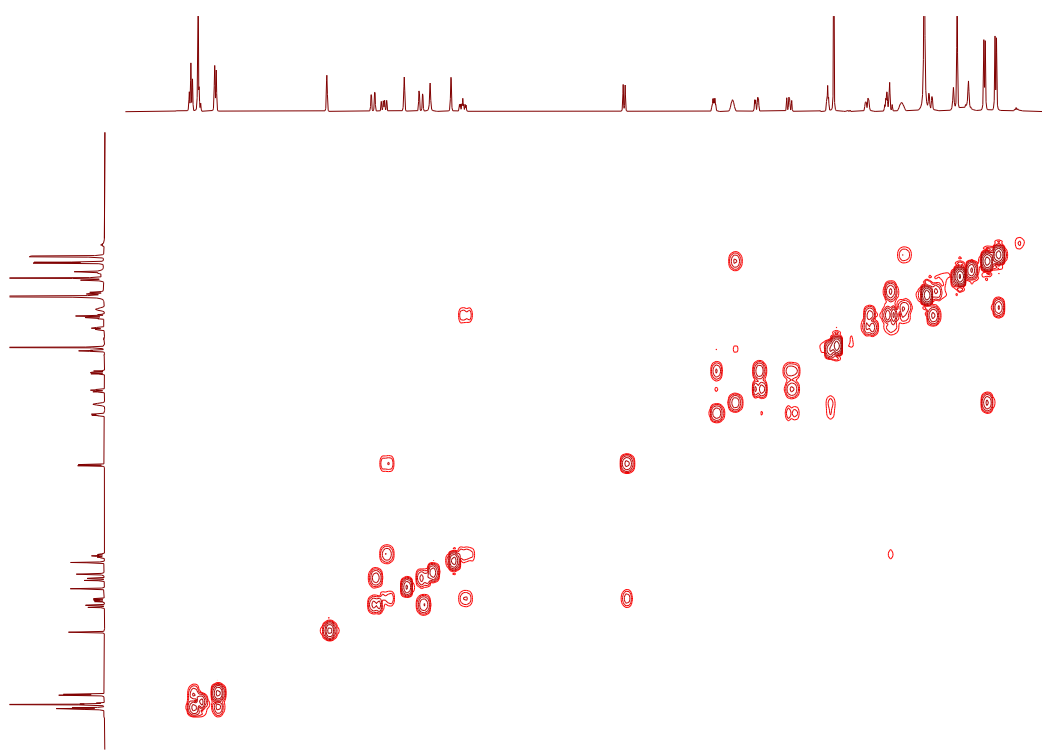

**Figure S43.** <sup>1</sup>H-<sup>1</sup>H COSY spectrum of **5** (600 MHz, CDCl<sub>3</sub>).



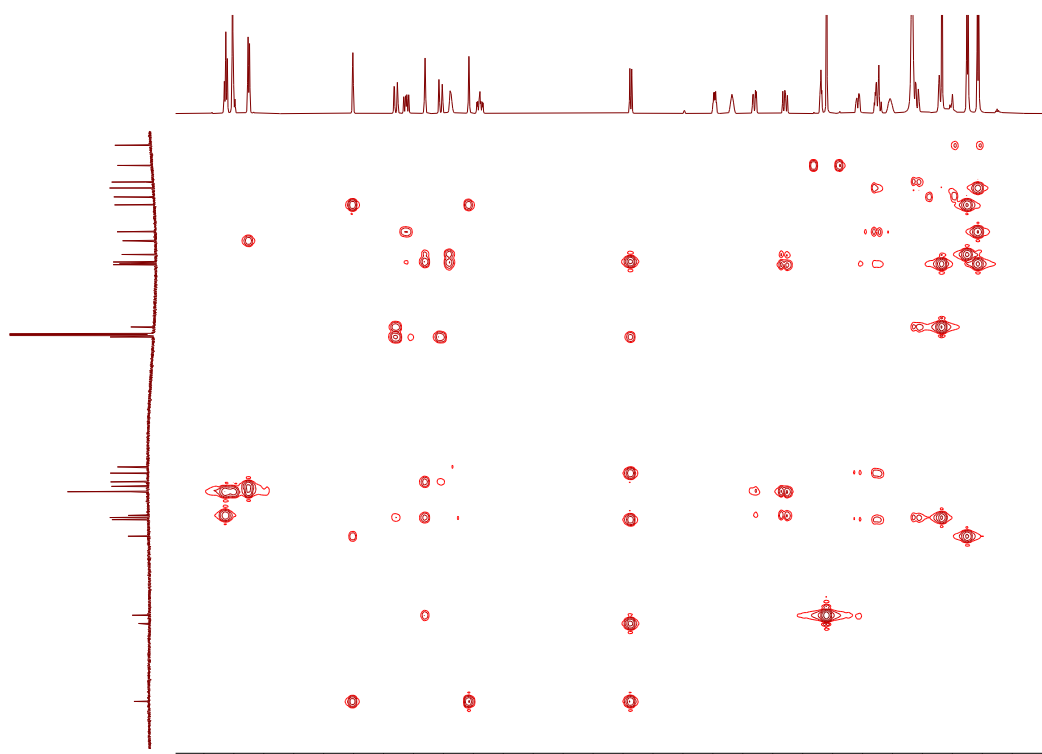

**Figure S44.** HMBC spectrum of **5** (600 MHz,  $\text{CDCl}_3$ ).

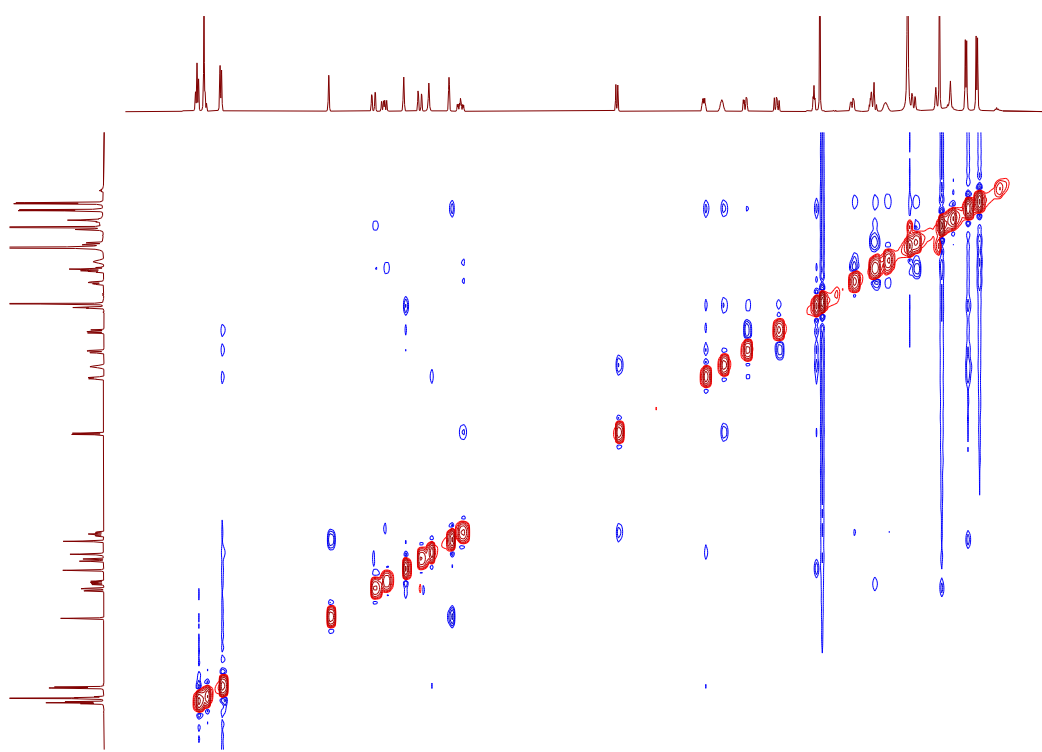

**Figure S45.** ROESY spectrum of **5** (600 MHz,  $\text{CDCl}_3$ ).

## Qualitative Analysis Report

|                        |              |               |                      |
|------------------------|--------------|---------------|----------------------|
| Data Filename          | SHJ29.d      | Sample Name   | SHJ29                |
| Sample Type            | Sample       | Position      | P1-A1                |
| Instrument Name        | Instrument 1 | User Name     |                      |
| Acq Method             | SIBU.m       | Acquired Time | 7/16/2015 3:13:22 PM |
| IRM Calibration Status | Success      | DA Method     | Default.m            |
| Comment                |              |               |                      |

  

|                |                             |       |  |
|----------------|-----------------------------|-------|--|
| Sample Group   |                             | Info. |  |
| Acquisition SW | 6200 series TOF/6500 series |       |  |
| Version        | Q-TOF B.05.01 (B5125.2)     |       |  |

### User Spectra

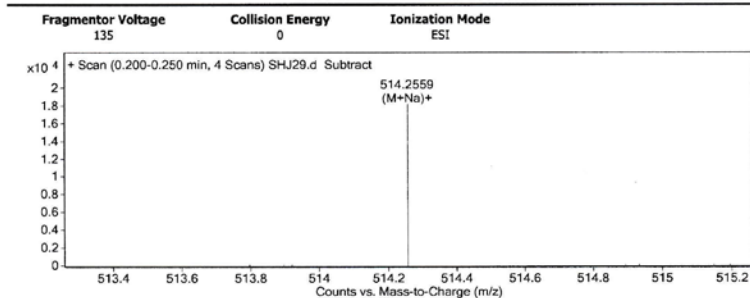

#### Peak List

| m/z      | z | Abund    | Formula      | Ion     |
|----------|---|----------|--------------|---------|
| 102.128  |   | 2445.02  |              |         |
| 306.6404 | 2 | 2378.82  |              |         |
| 432.2536 | 1 | 3563.13  |              |         |
| 492.2744 | 1 | 4787.3   |              |         |
| 514.2559 | 1 | 18229.21 | C30 H37 N O5 | (M+Na)+ |
| 515.2594 | 1 | 5280.5   | C30 H37 N O5 | (M+Na)+ |
| 530.2295 | 1 | 7563.51  |              |         |
| 531.2326 | 1 | 2451     |              |         |

#### Formula Calculator Element Limits

| Element | Min | Max |
|---------|-----|-----|
| C       | 3   | 60  |
| H       | 0   | 120 |
| O       | 0   | 10  |
| N       | 0   | 5   |

#### Formula Calculator Results

| Formula      | CalculatedMass | CalculatedMz | Mz       | Diff. (mDa) | Diff. (ppm) | DBE     |
|--------------|----------------|--------------|----------|-------------|-------------|---------|
| C30 H37 N O5 | 491.2672       | 514.2564     | 514.2559 | 0.4         | 0.9         | 13.0000 |

--- End Of Report ---

**Figure S46. HRESIMS spectrum of 5.**

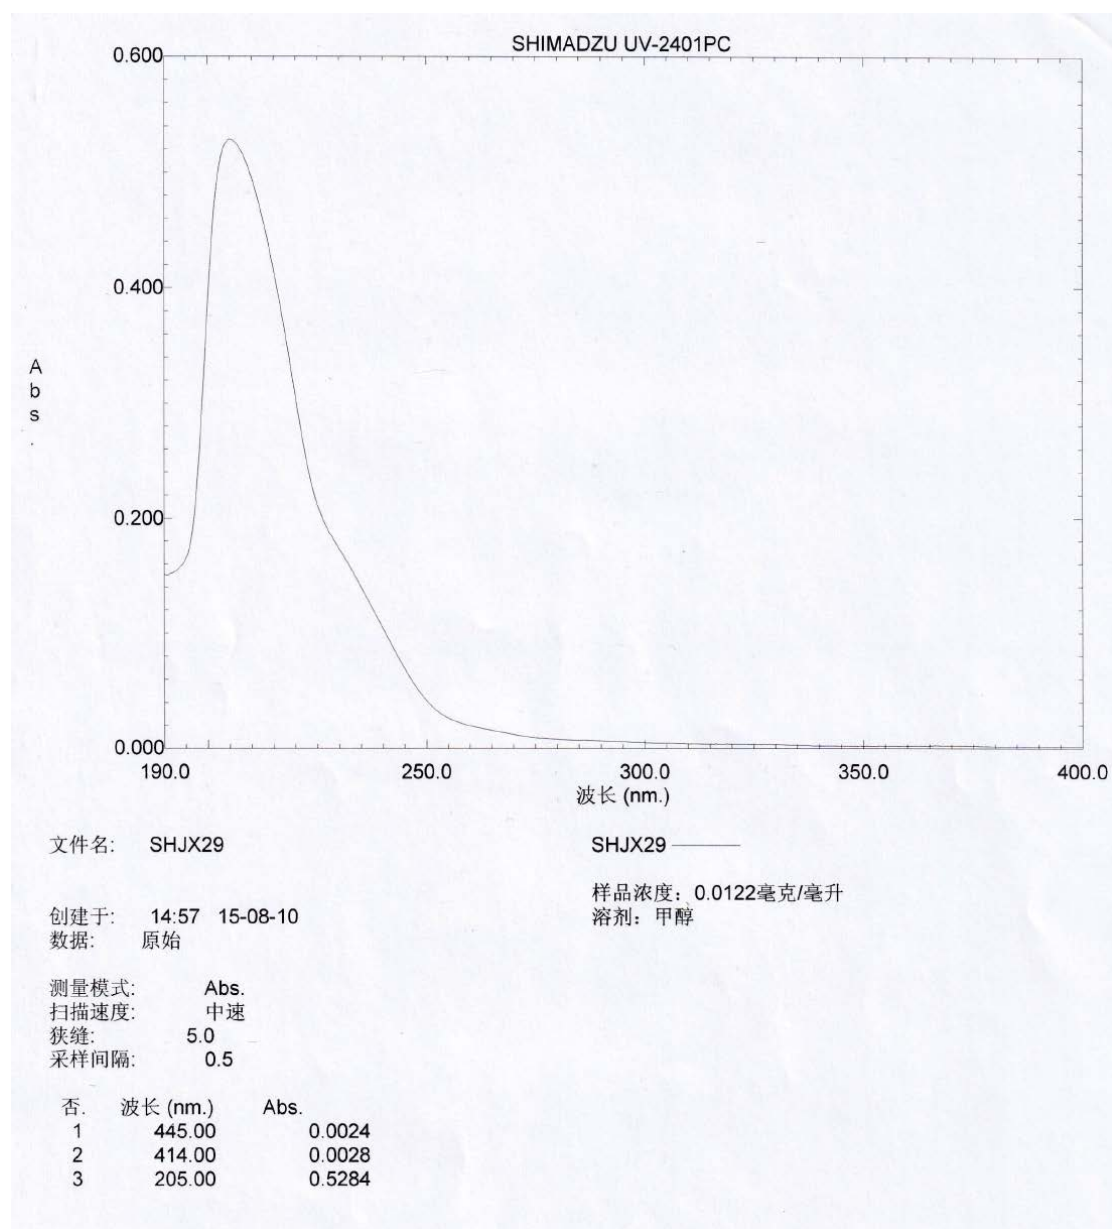

**Figure S47.** UV spectrum of **5**.

Optical rotation measurement

Model : P-1020 (A060460638)

| No.  | Sample   | Mode   | Data     | Monitor Blank     | Temp. Cell Temp Point | Date Comment Sample Name                               | Light Filter Operator | Cycle Time Integ Time |
|------|----------|--------|----------|-------------------|-----------------------|--------------------------------------------------------|-----------------------|-----------------------|
| No.1 | 13 (1/3) | Sp.Rot | -11.6840 | -0.0111<br>0.0000 | 23.6<br>50.00<br>Cell | Thu Aug 06 17:34:16 2015<br>0.00190g/mL MeOH<br>SHJX29 | Na<br>589nm           | 2 sec<br>10 sec       |
| No.2 | 13 (2/3) | Sp.Rot | -12.9470 | -0.0123<br>0.0000 | 23.5<br>50.00<br>Cell | Thu Aug 06 17:34:29 2015<br>0.00190g/mL MeOH<br>SHJX29 | Na<br>589nm           | 2 sec<br>10 sec       |
| No.3 | 13 (3/3) | Sp.Rot | -12.2110 | -0.0116<br>0.0000 | 23.4<br>50.00<br>Cell | Thu Aug 06 17:34:43 2015<br>0.00190g/mL MeOH<br>SHJX29 | Na<br>589nm           | 2 sec<br>10 sec       |

**Figure S48.** ORD spectrum of **5**.

SHJX29

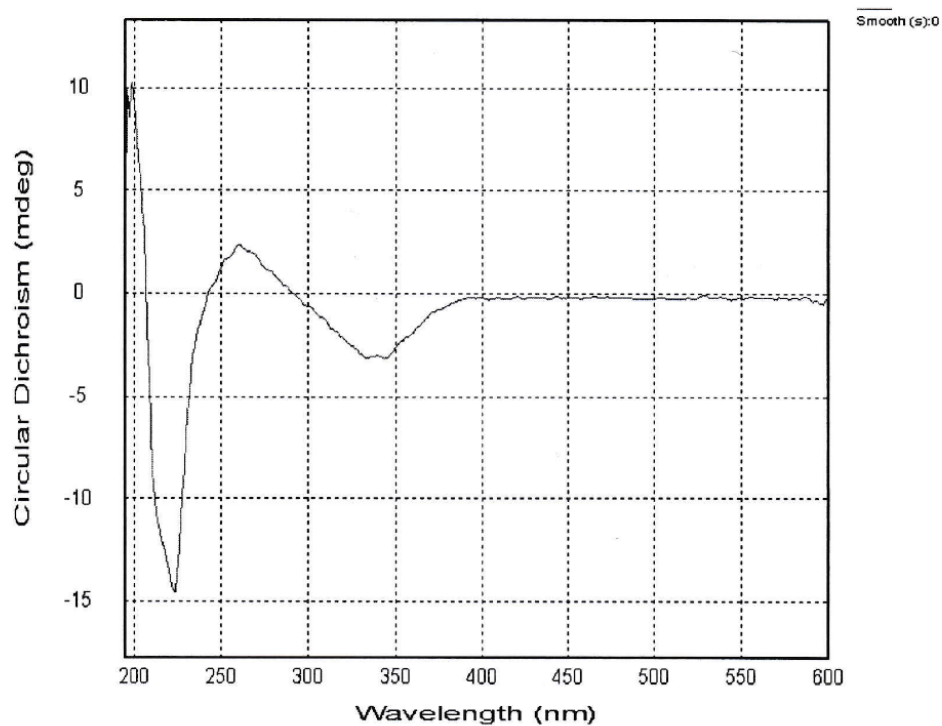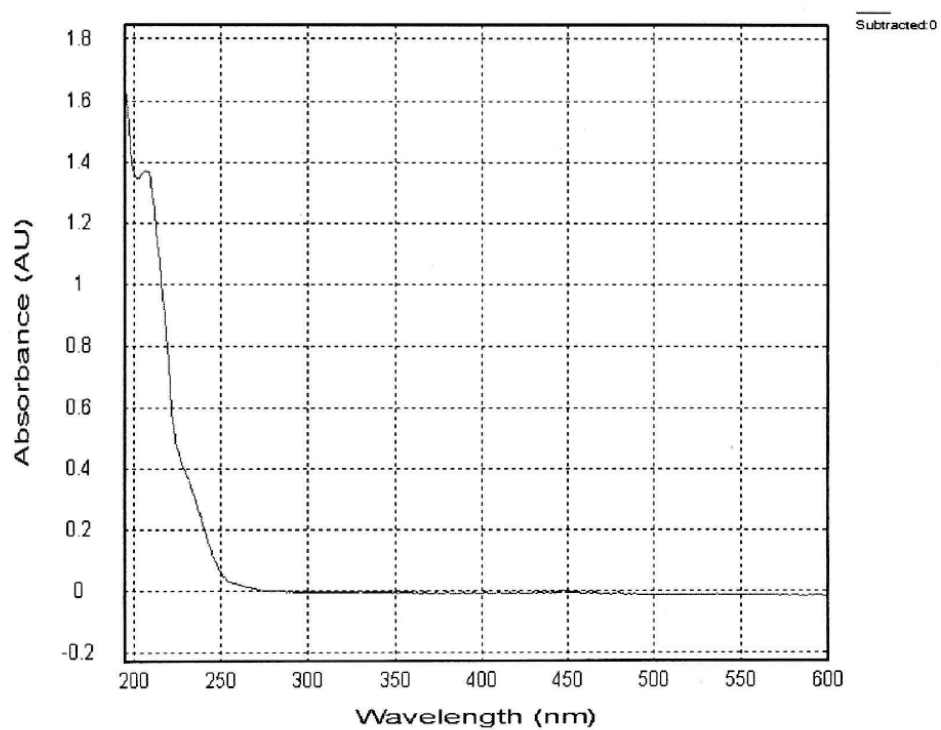

**Figure S49.** CD spectrum of **5**.

**6. NMR, HRESIMS, UV, ORD, and CD spectra of compound 6**

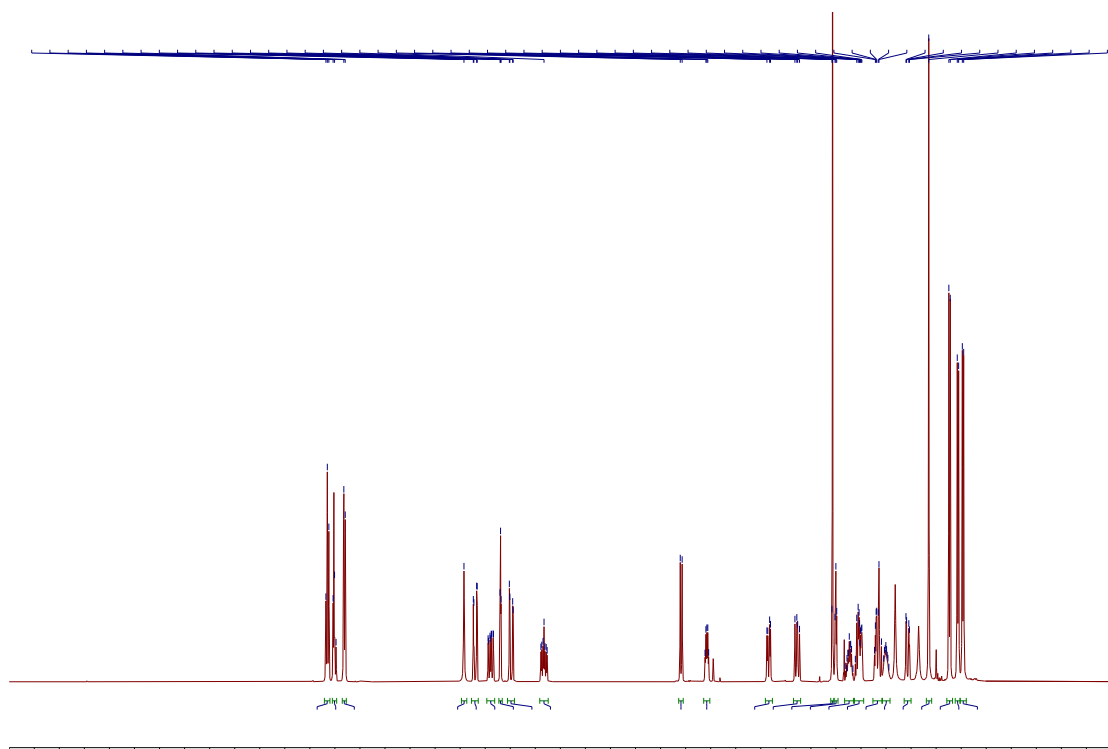

**Figure S50.**  $^1\text{H}$  NMR spectrum of **6** (500 MHz,  $\text{CDCl}_3$ ).

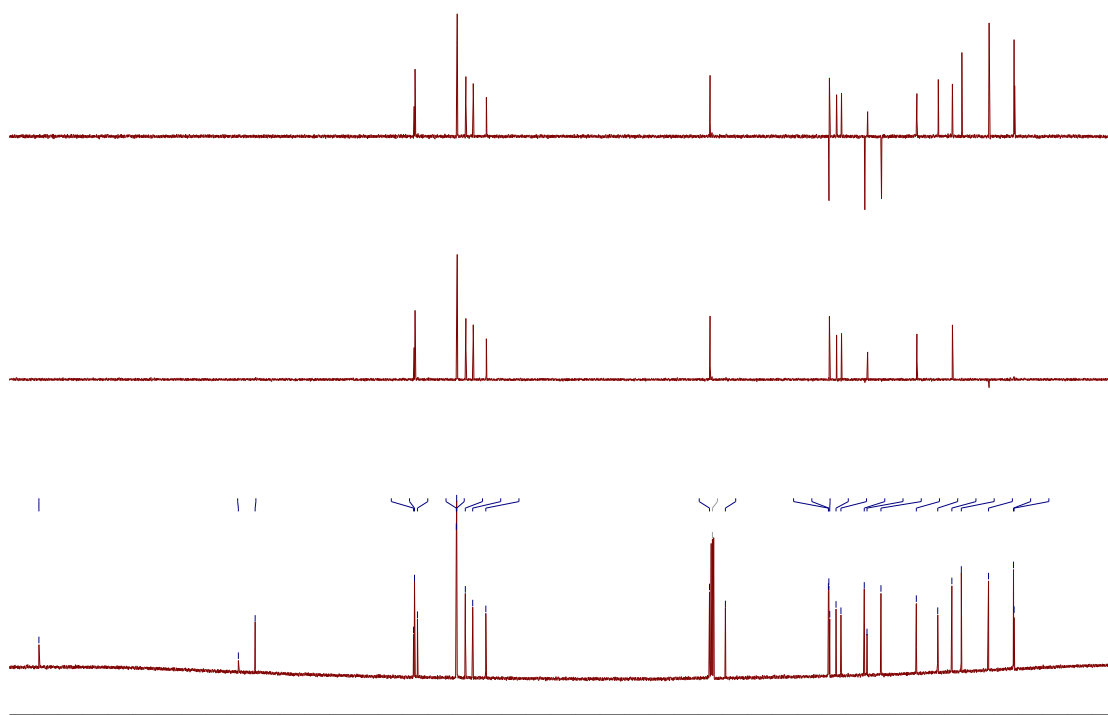

**Figure S51.**  $^{13}\text{C}$  NMR, DEPT-90 and DEPT-135 spectra of **6** (125 MHz,  $\text{CDCl}_3$ ).

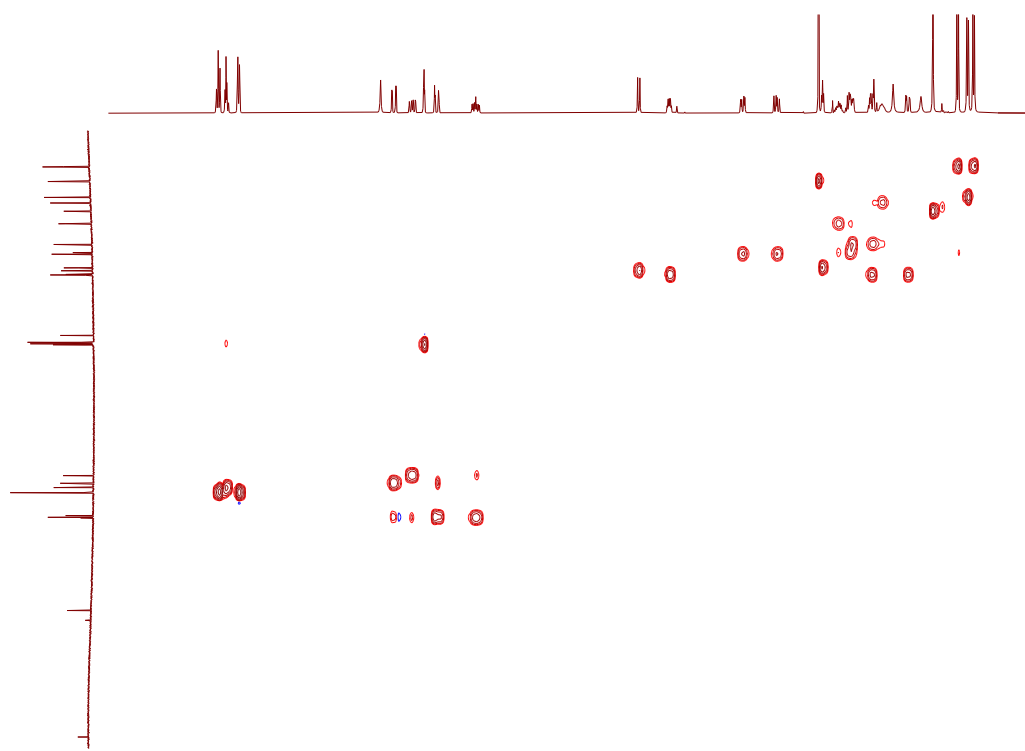

**Figure S52.** HSQC spectrum of **6** (500 MHz, CDCl<sub>3</sub>).

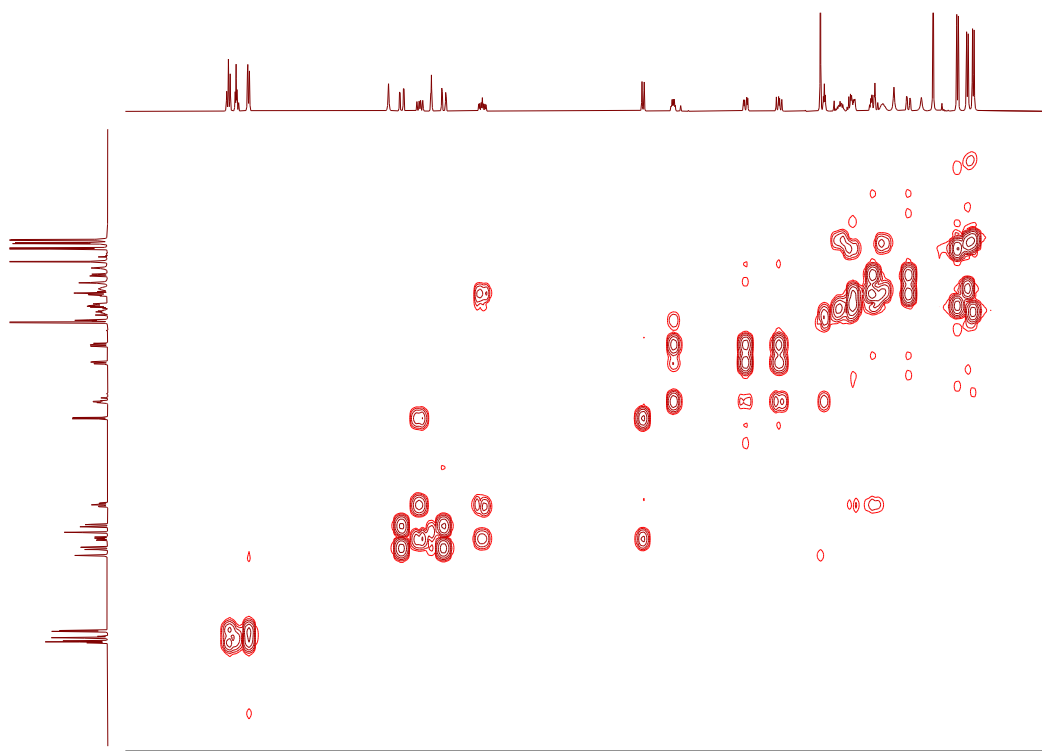

**Figure S53.** <sup>1</sup>H-<sup>1</sup>H COSY spectrum of **6** (500 MHz, CDCl<sub>3</sub>).

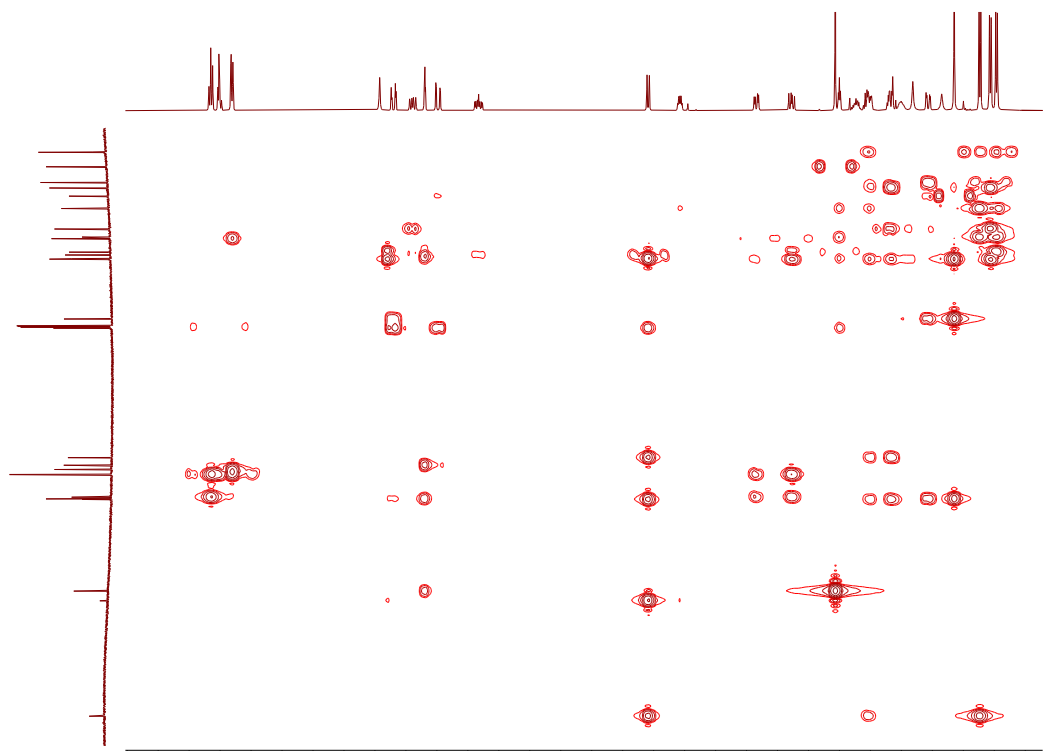

**Figure S54.** HMBC spectrum of **6** (500 MHz, CDCl<sub>3</sub>).

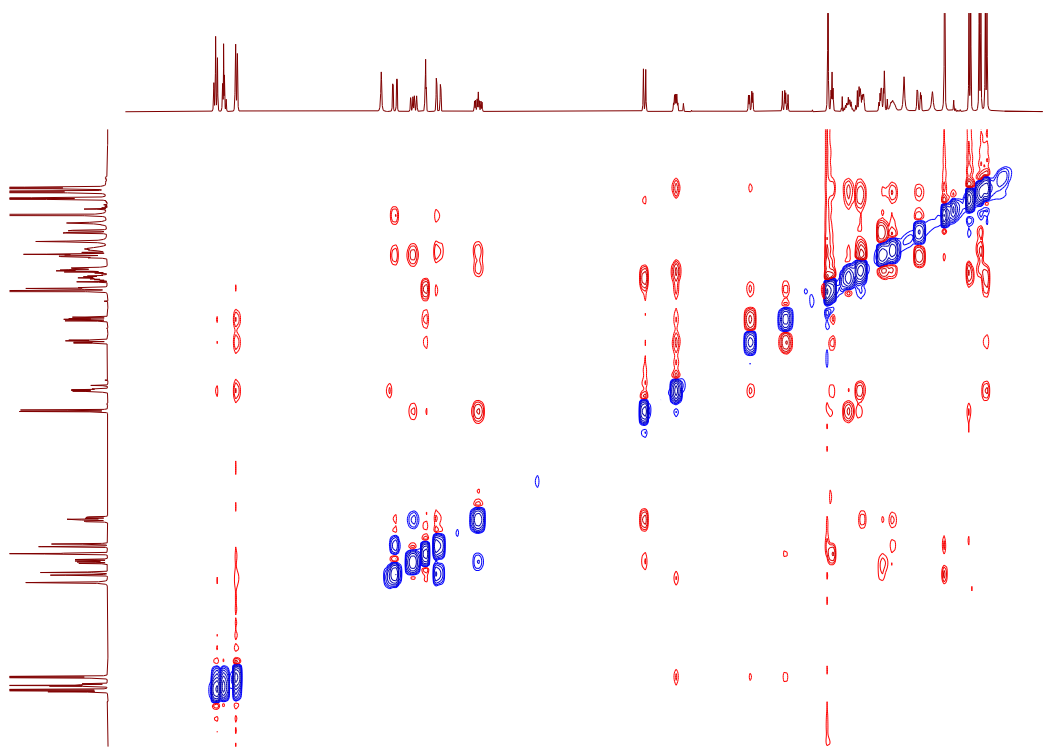

**Figure S55.** ROESY spectrum of **6** (500 MHz, CDCl<sub>3</sub>).

## Qualitative Analysis Report

|                        |              |               |                      |
|------------------------|--------------|---------------|----------------------|
| Data Filename          | SHJ31.d      | Sample Name   | SHJ31                |
| Sample Type            | Sample       | Position      | P1-A2                |
| Instrument Name        | Instrument 1 | User Name     |                      |
| Acq Method             | SIBU.m       | Acquired Time | 7/16/2015 3:14:52 PM |
| IRM Calibration Status | Success      | DA Method     | Default.m            |
| Comment                |              |               |                      |

  

|                |                             |       |  |
|----------------|-----------------------------|-------|--|
| Sample Group   |                             | Info. |  |
| Acquisition SW | 6200 series TOF/6500 series |       |  |
| Version        | Q-TOF B.05.01 (B5125.2)     |       |  |

### User Spectra

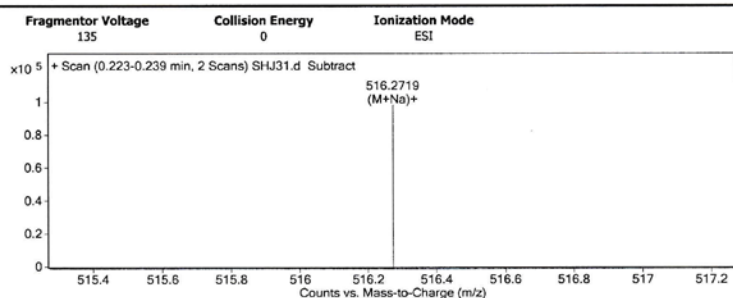

### Peak List

| m/z       | z | Abund    | Formula      | Ion     |
|-----------|---|----------|--------------|---------|
| 494.2902  | 1 | 34874.45 |              |         |
| 516.2719  | 1 | 98321.98 | C30 H39 N O5 | (M+Na)+ |
| 532.245   | 1 | 40913.93 |              |         |
| 987.5729  | 1 | 45465.29 |              |         |
| 1009.5546 | 1 | 49088.25 |              |         |
| 1025.5275 | 1 | 37422.34 |              |         |
| 1502.8366 | 1 | 59278.76 |              |         |
| 1503.8395 | 1 | 61104.78 |              |         |

### Formula Calculator Element Limits

| Element | Min | Max |
|---------|-----|-----|
| C       | 3   | 60  |
| H       | 0   | 120 |
| O       | 0   | 10  |
| N       | 0   | 5   |

### Formula Calculator Results

| Formula      | CalculatedMass | CalculatedMz | Mz       | Diff. (mDa) | Diff. (ppm) | DBE     |
|--------------|----------------|--------------|----------|-------------|-------------|---------|
| C30 H39 N O5 | 493.2828       | 516.2720     | 516.2719 | 0.3         | 0.5         | 12.0000 |

--- End Of Report ---

Figure S56. HRESIMS spectrum of **6**.



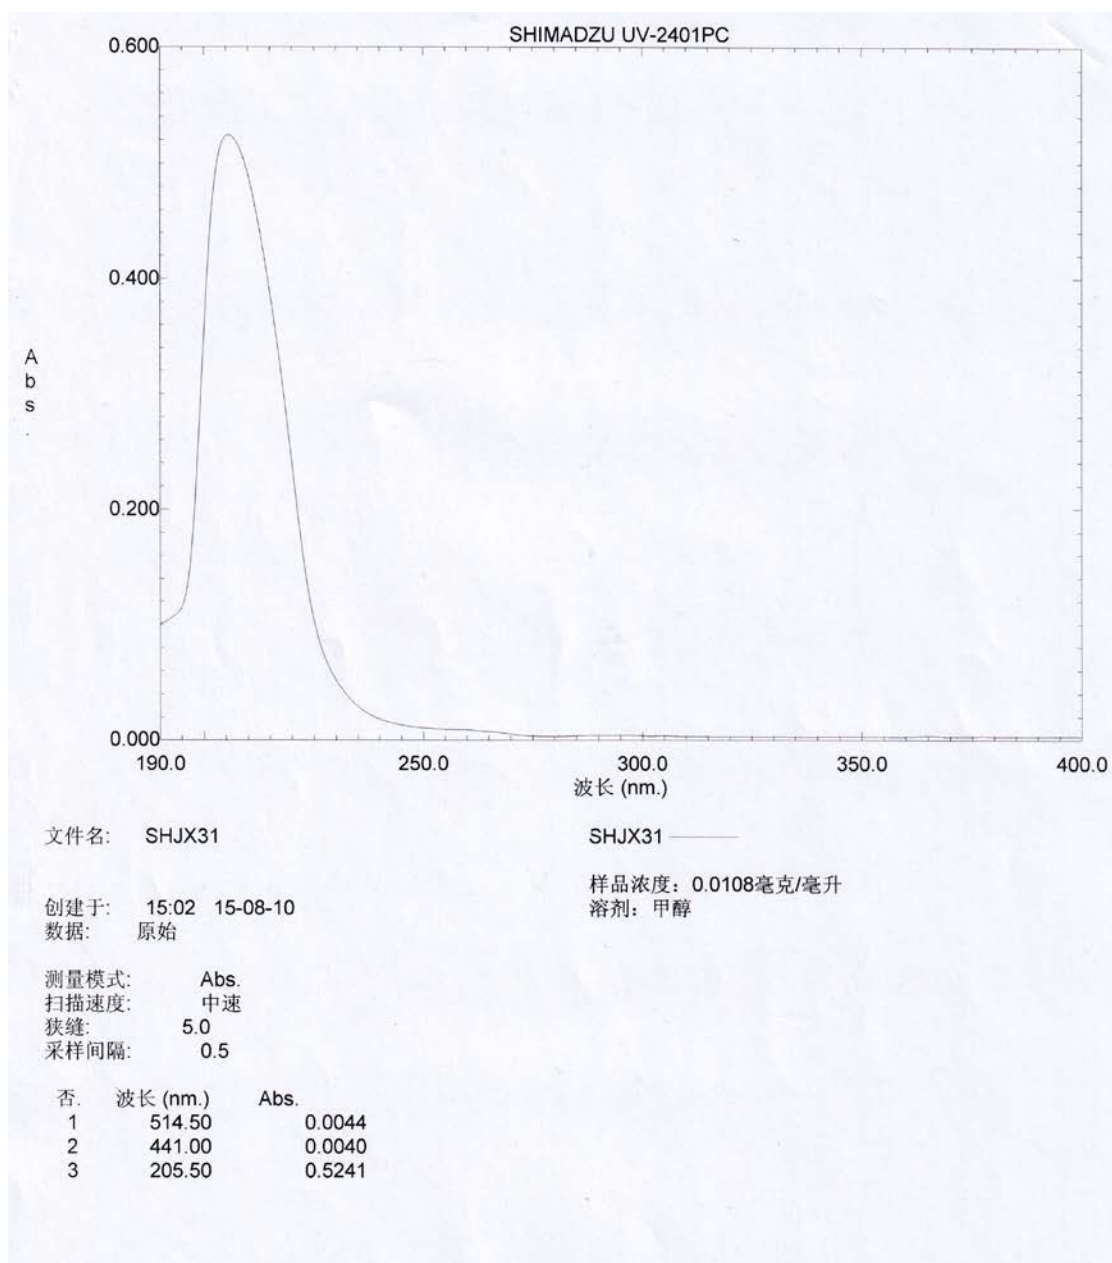

**Figure S57.** UV spectrum of **6**.

Optical rotation measurement

Model : P-1020 (A060460638)

| No.  | Sample   | Mode   | Data     | Monitor<br>Blank  | Temp.<br>Cell<br>Temp Point | Date<br>Comment<br>Sample Name                         | Light<br>Filter<br>Operator | Cycle Time<br>Integ Time |
|------|----------|--------|----------|-------------------|-----------------------------|--------------------------------------------------------|-----------------------------|--------------------------|
| No.1 | 14 (1/3) | Sp.Rot | -64.2490 | -0.0620<br>0.0000 | 23.6<br>50.00<br>Cell       | Thu Aug 06 17:42:47 2015<br>0.00193g/mL MeOH<br>SHJX31 | Na<br>589nm                 | 2 sec<br>10 sec          |
| No.2 | 14 (2/3) | Sp.Rot | -63.1090 | -0.0609<br>0.0000 | 23.6<br>50.00<br>Cell       | Thu Aug 06 17:43:00 2015<br>0.00193g/mL MeOH<br>SHJX31 | Na<br>589nm                 | 2 sec<br>10 sec          |
| No.3 | 14 (3/3) | Sp.Rot | -62.1760 | -0.0600<br>0.0000 | 23.6<br>50.00<br>Cell       | Thu Aug 06 17:43:14 2015<br>0.00193g/mL MeOH<br>SHJX31 | Na<br>589nm                 | 2 sec<br>10 sec          |

**Figure S58.** ORD spectrum of **6**.

SHJX31

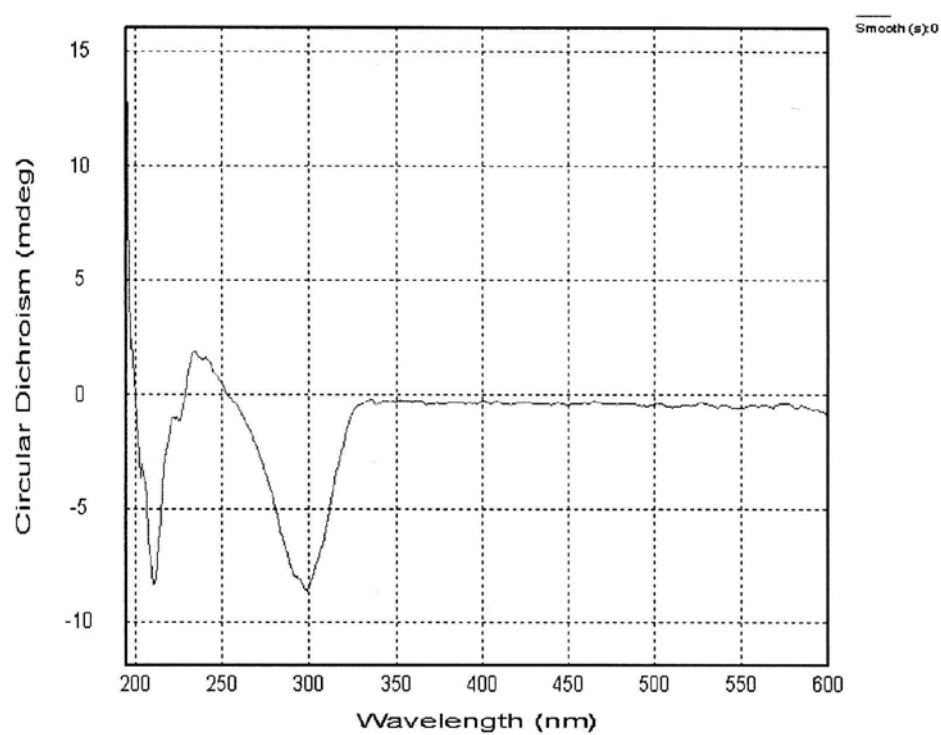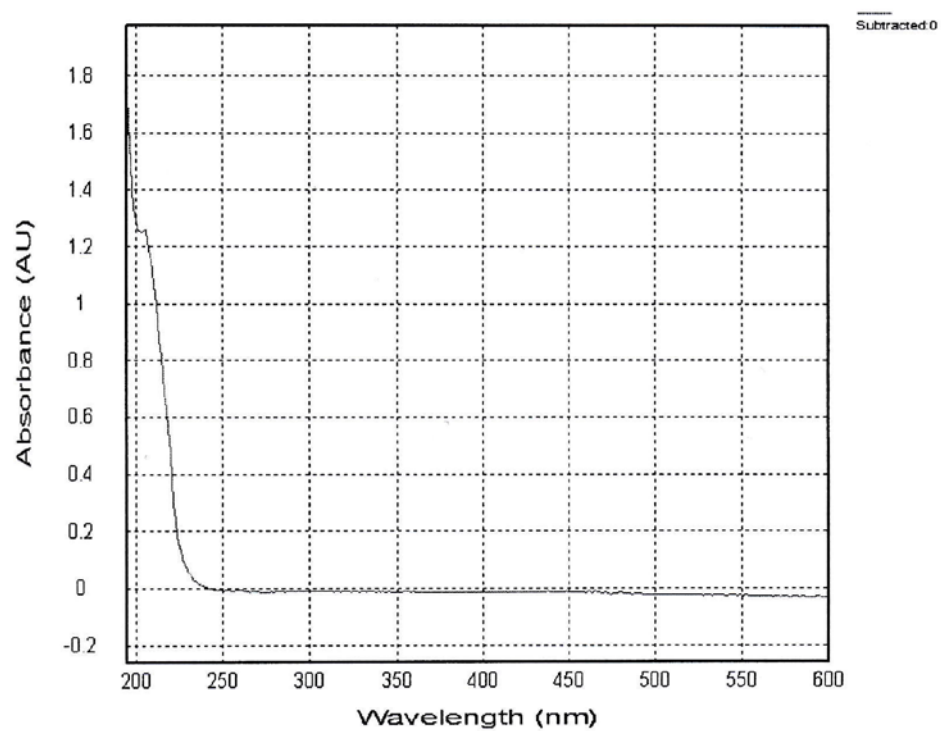

**Figure S59.** CD spectrum of **6**.

7. NMR, HRESIMS, UV, ORD, and CD spectra of compound 7

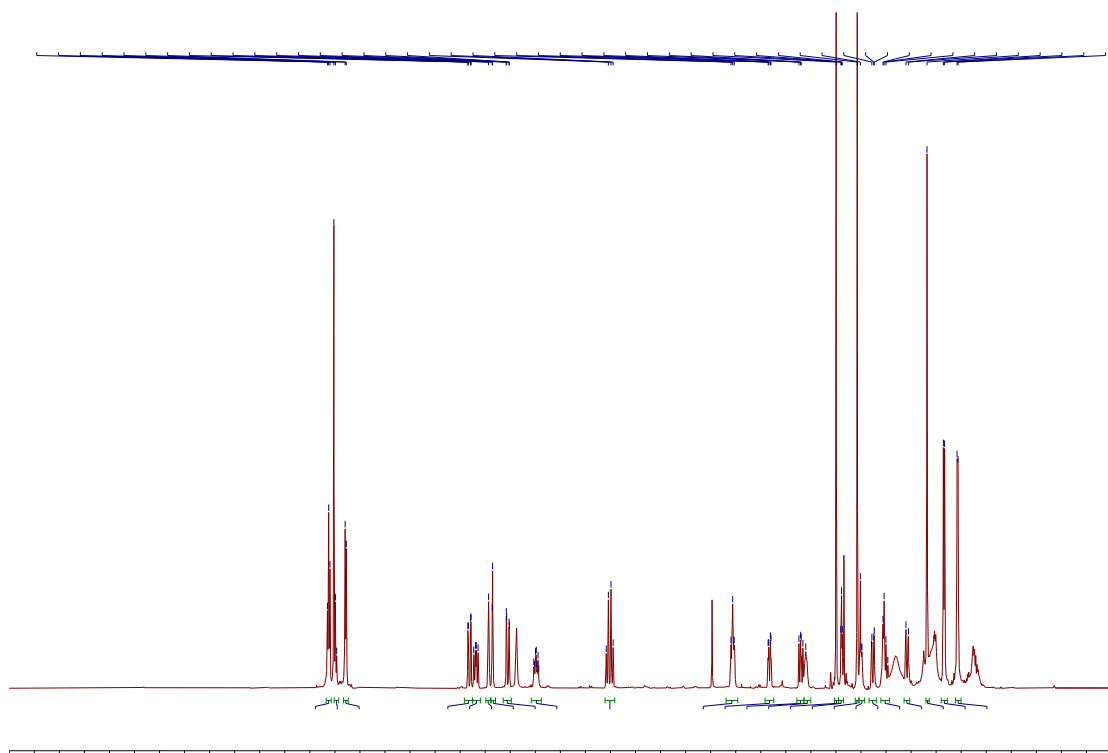

Figure S60.  $^1\text{H}$  NMR spectrum of 7 (600 MHz,  $\text{CDCl}_3$ ).

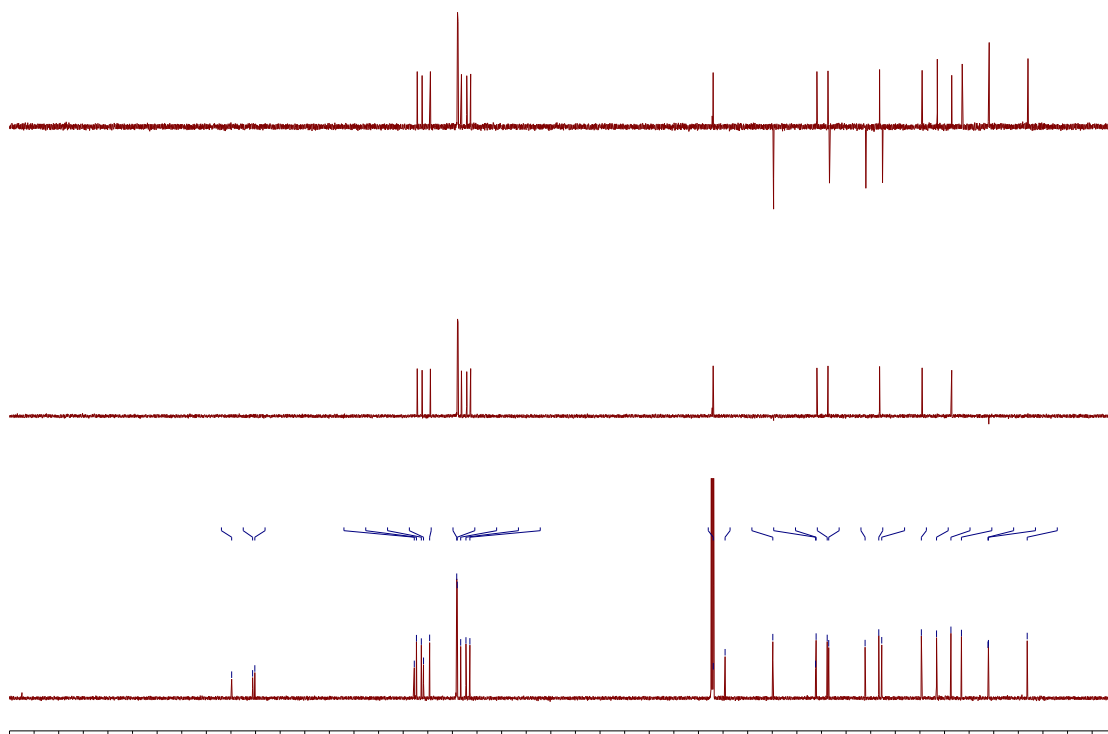

**Figure S61.**  $^{13}\text{C}$  NMR, DEPT-90 and DEPT-135 spectra of **7** (150 MHz,  $\text{CDCl}_3$ ).

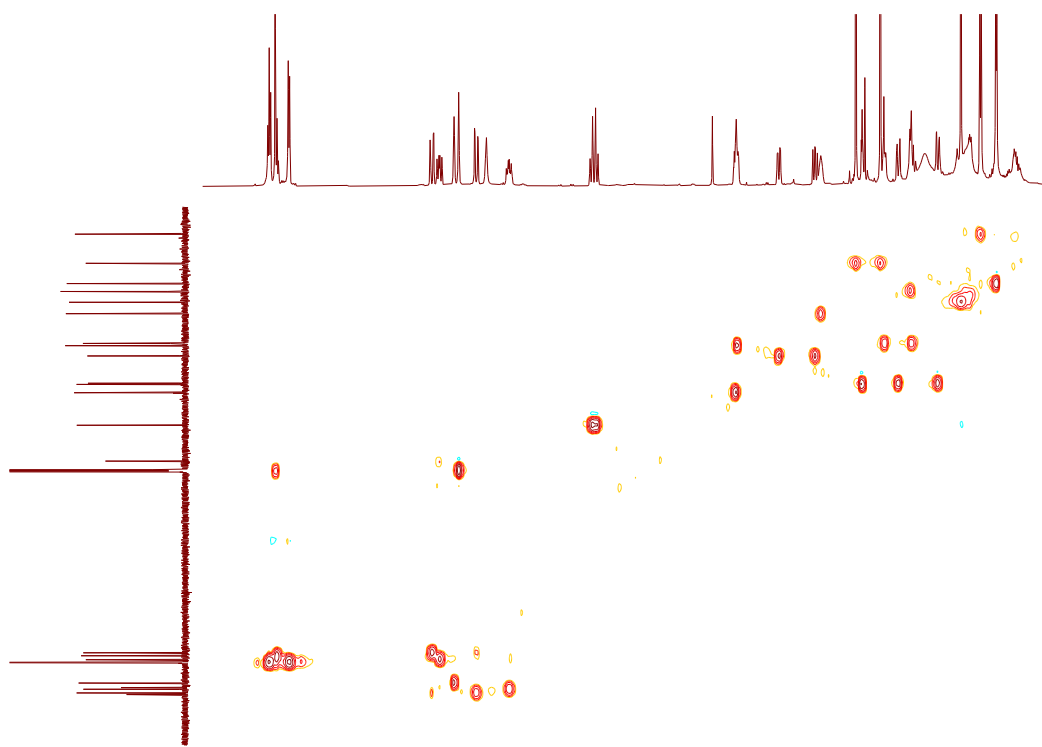

**Figure S62.** HSQC spectrum of **7** (600 MHz,  $\text{CDCl}_3$ ).

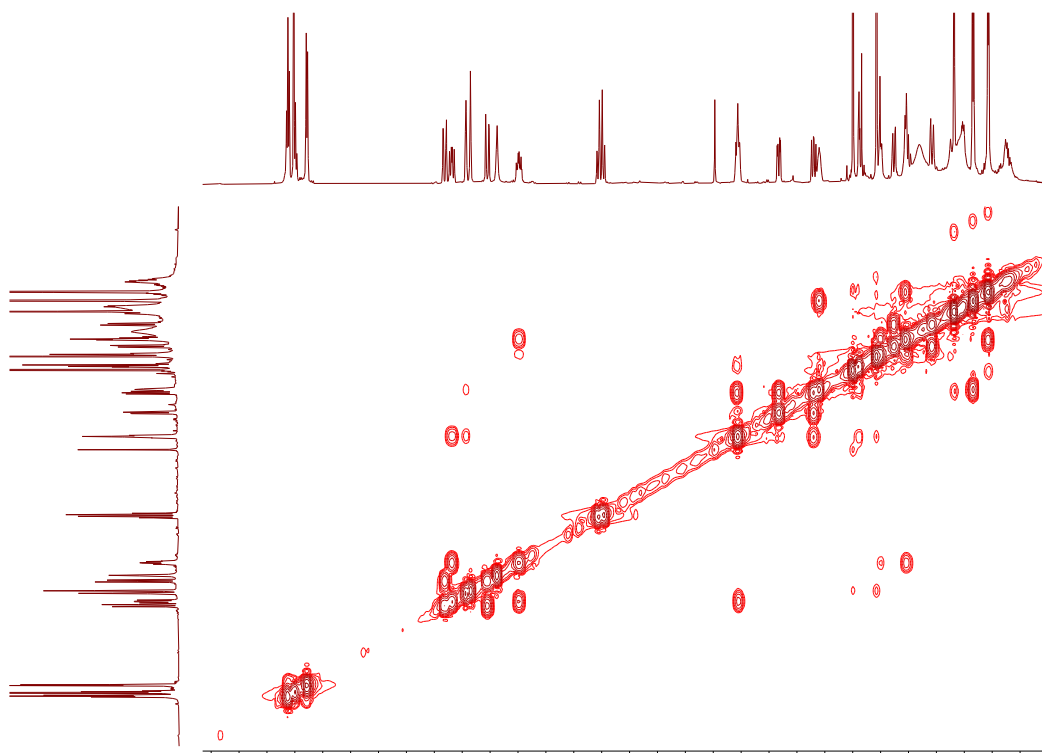

**Figure S63.**  $^1\text{H}$ - $^1\text{H}$  COSY spectrum of **7** (600 MHz,  $\text{CDCl}_3$ ).

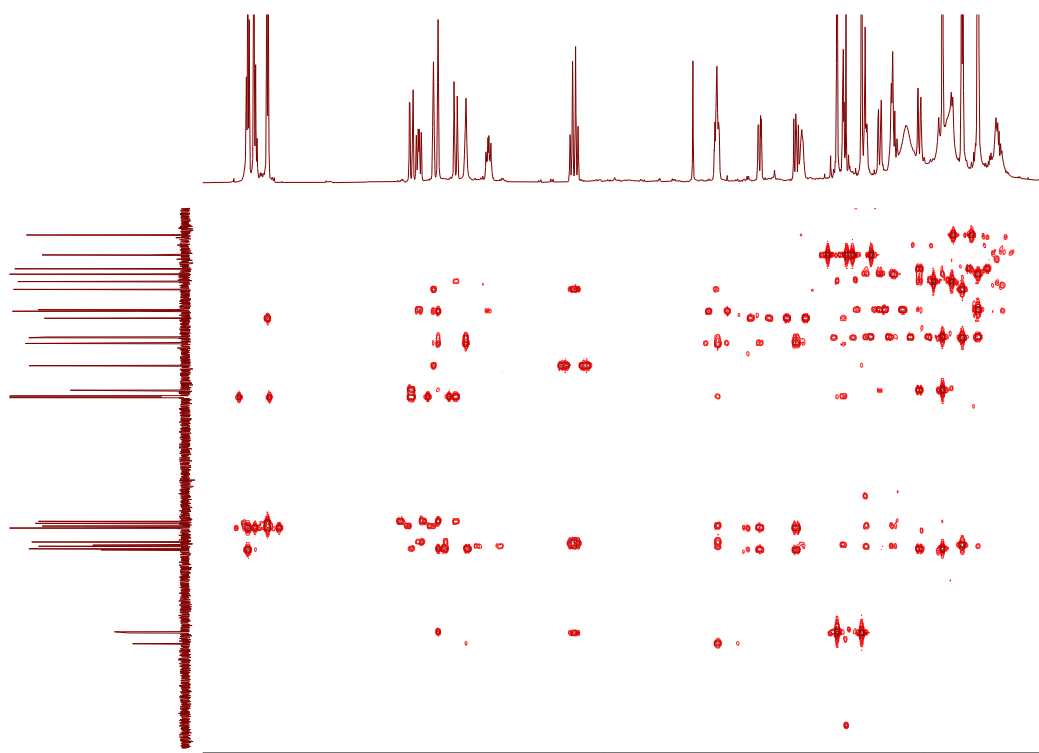

**Figure S64.** HMBC spectrum of **7** (600 MHz,  $\text{CDCl}_3$ ).

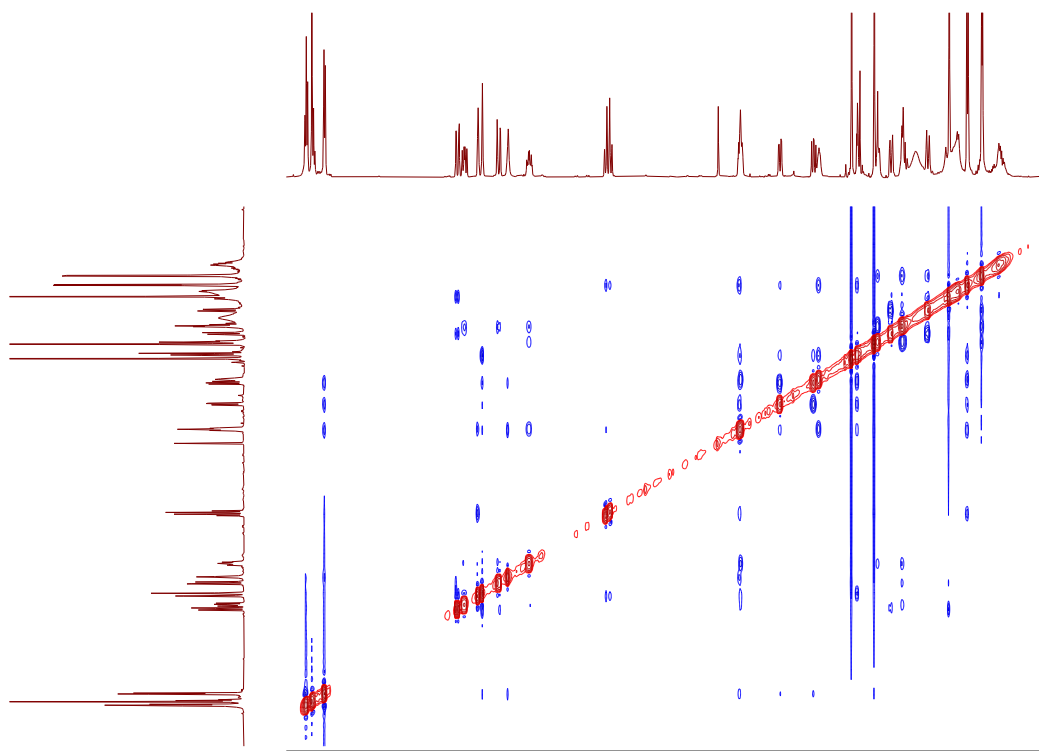

**Figure S65.** ROESY spectrum of **7** (600 MHz,  $\text{CDCl}_3$ ).

## Qualitative Analysis Report

|                        |              |               |                       |
|------------------------|--------------|---------------|-----------------------|
| Data Filename          | SHJ20.d      | Sample Name   | SHJ20                 |
| Sample Type            | Sample       | Position      | P1-A1                 |
| Instrument Name        | Instrument 1 | User Name     |                       |
| Acq Method             | SIBU.m       | Acquired Time | 12/30/2014 1:43:33 PM |
| IRM Calibration Status | Success      | DA Method     | Default.m             |
| Comment                |              |               |                       |

|                |                             |
|----------------|-----------------------------|
| Sample Group   | Info.                       |
| Acquisition SW | 6200 series TOF/6500 series |
| Version        | Q-TOF B.05.01 (B5125.2)     |

### User Spectra

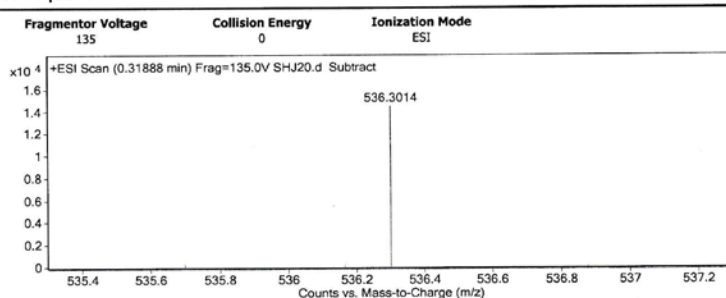

#### Peak List

| m/z      | z | Abund    | Formula      | Ion    |
|----------|---|----------|--------------|--------|
| 416.2584 | 1 | 18167.43 |              |        |
| 476.2792 | 1 | 37347.07 |              |        |
| 536.3014 | 1 | 14513.92 | C32 H41 N O6 | (M+H)+ |
| 558.2831 | 1 | 73034.31 |              |        |
| 559.2863 | 1 | 29266.66 |              |        |

#### Formula Calculator Element Limits

| Element | Min | Max |
|---------|-----|-----|
| C       | 3   | 60  |
| H       | 0   | 120 |
| O       | 0   | 10  |
| N       | 0   | 3   |

#### Formula Calculator Results

| Formula      | CalculatedMass | CalculatedMz | Mz       | Diff. (mDa) | Diff. (ppm) | DBE     |
|--------------|----------------|--------------|----------|-------------|-------------|---------|
| C32 H41 N O6 | 535.2934       | 536.3007     | 536.3014 | -0.4        | -0.8        | 13.0000 |

--- End Of Report ---

Figure S66. HRESIMS spectrum of 7.

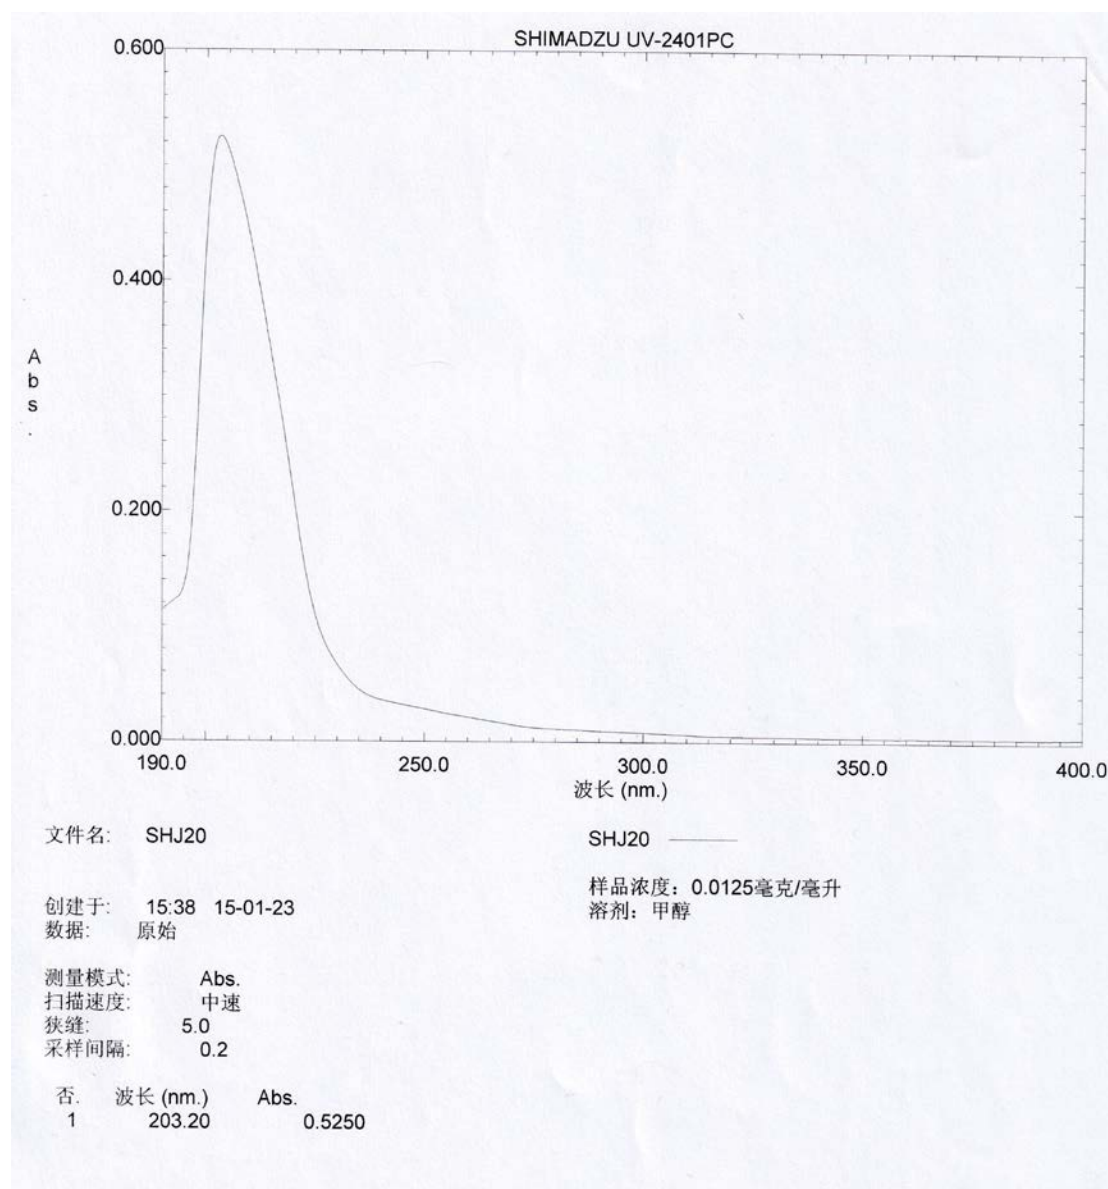

**Figure S67.** UV spectrum of **7**.

Optical rotation measurement

Model : P-1020 (A060460638)

| No.  | Sample   | Mode   | Data     | Monitor Blank     | Temp. Cell Temp Point | Date Comment Sample Name                              | Light Filter Operator | Cycle Time Integ Time |
|------|----------|--------|----------|-------------------|-----------------------|-------------------------------------------------------|-----------------------|-----------------------|
| No.1 | 21 (1/3) | Sp.Rot | -28.5870 | -0.0263<br>0.0000 | 19.6<br>50.00<br>Cell | Thu Jan 22 18:33:53 2015<br>0.00184g/mL MeOH<br>SHJ20 | Na<br>589nm           | 2 sec<br>10 sec       |
| No.2 | 21 (2/3) | Sp.Rot | -29.4570 | -0.0271<br>0.0000 | 19.6<br>50.00<br>Cell | Thu Jan 22 18:34:06 2015<br>0.00184g/mL MeOH<br>SHJ20 | Na<br>589nm           | 2 sec<br>10 sec       |
| No.3 | 21 (3/3) | Sp.Rot | -27.1740 | -0.0250<br>0.0000 | 19.6<br>50.00<br>Cell | Thu Jan 22 18:34:20 2015<br>0.00184g/mL MeOH<br>SHJ20 | Na<br>589nm           | 2 sec<br>10 sec       |

-28.4058°

**Figure S68.** ORD spectrum of **7**.

SHJ20

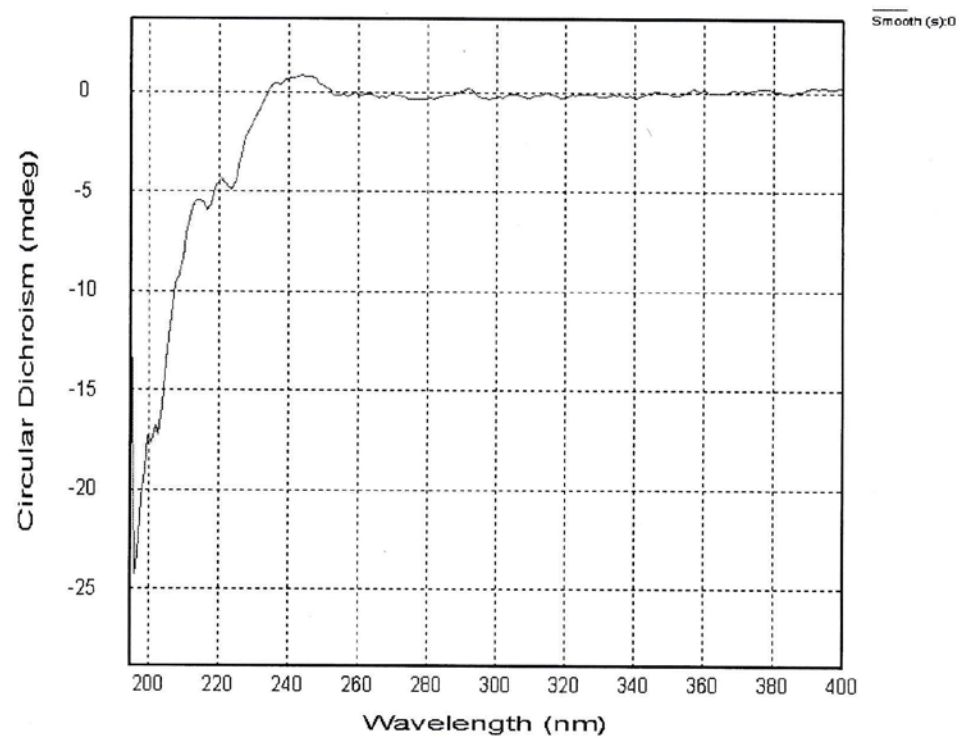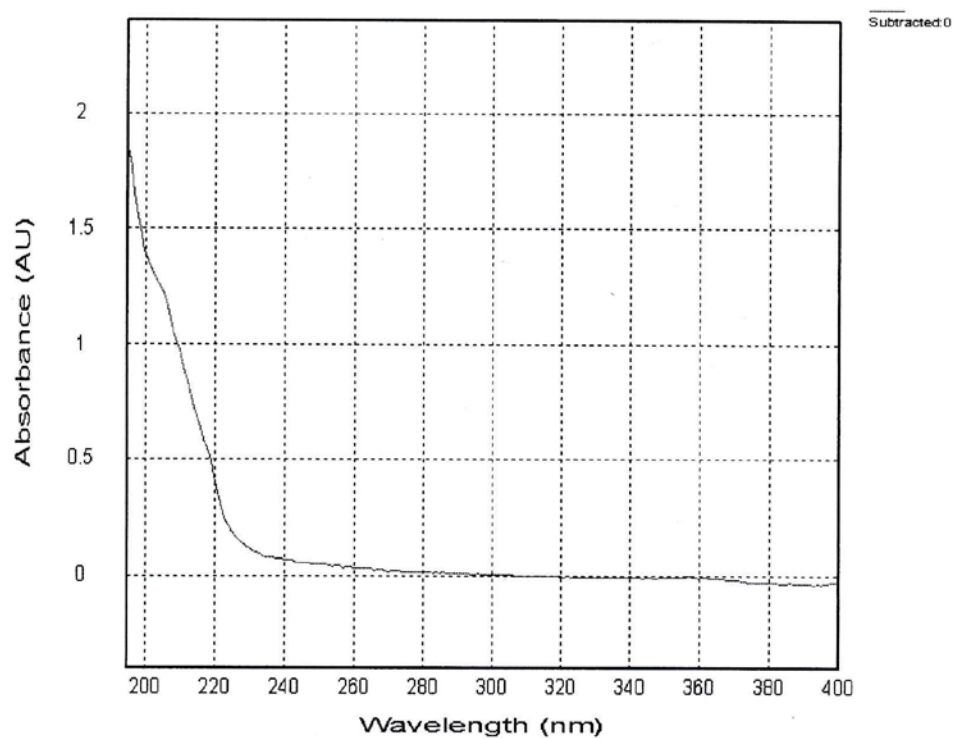

**Figure S69.** CD spectrum of **7**.
